# Supplementary material for: Genomic and Secondary Metabolite Analyses of Streptomyces sp. 2AW Provide Insight into the Evolution of the Cycloheximide Pathway
Source: Front Microbiol. 2016 May 3;7:573. doi: 10.3389/fmicb.2016.00573 (PMC4853412; doi:10.3389/fmicb.2016.00573)
Supplement: TABLE S4 — Streptomyces sp. 2AW genome basic characteristics. [file Table_4.XLSX]

## Sheet: Sheet1
Supplemental Table 4 - Streptomyces sp 2AW Genome basic characteristics
Scaffold	Length (bp)	GC	Number og Genes
Ga0065883_101	320088	0.7	308
Ga0065883_102	465568	0.71	411
Ga0065883_103	713598	0.7	637
Ga0065883_104	1361107	0.7	1226
Ga0065883_105	46258	0.7	41
Ga0065883_106	36025	0.68	36
Ga0065883_107	568441	0.71	486
Ga0065883_108	1128172	0.71	977
Ga0065883_109	1862830	0.71	1731
Ga0065883_110	529702	0.71	464
Ga0065883_111	5349	0.57	2
Ga0065883_112	2412445	0.7	2012
