# Supplementary material for: Genomic and Secondary Metabolite Analyses of Streptomyces sp. 2AW Provide Insight into the Evolution of the Cycloheximide Pathway
Source: Front Microbiol. 2016 May 3;7:573. doi: 10.3389/fmicb.2016.00573 (PMC4853412; doi:10.3389/fmicb.2016.00573)
Supplement: TABLE S5 — Gene annotation Streptomyces sp. 2AW genome. [file Table_5.XLS]

## Sheet: Supplemental Table 5 - Gene ann
Gene_ID	Locus Tag	Source	Cluster Annotation	Gene Annotation	E-value
2606548067	Ga0065883_1011	pfam13613	HTH_Tnp_4		1.9e-07
2606548067	Ga0065883_1011	Product_name		Helix-turn-helix of DDE superfamily endonuclease
2606548067	Ga0065883_1011	DNA_length		312bp
2606548067	Ga0065883_1011	Protein_length		103aa
2606548068	Ga0065883_1012	pfam13701	DDE_Tnp_1_4		8.5e-16
2606548068	Ga0065883_1012	Product_name		Transposase DDE domain group 1
2606548068	Ga0065883_1012	DNA_length		564bp
2606548068	Ga0065883_1012	Protein_length		187aa
2606548069	Ga0065883_1013	Product_name		hypothetical protein
2606548069	Ga0065883_1013	DNA_length		306bp
2606548069	Ga0065883_1013	Protein_length		101aa
2606548070	Ga0065883_1014	pfam13610	DDE_Tnp_IS240		1.5e-31
2606548070	Ga0065883_1014	Product_name		putative transposase
2606548070	Ga0065883_1014	DNA_length		471bp
2606548070	Ga0065883_1014	Protein_length		156aa
2606548070	Ga0065883_1014	KO:K07498	putative transposase		1.4e-93
2606548071	Ga0065883_1015	pfam02371	Transposase_20		2.5e-22
2606548071	Ga0065883_1015	Product_name		Transposase IS116/IS110/IS902 family protein
2606548071	Ga0065883_1015	DNA_length		411bp
2606548071	Ga0065883_1015	Protein_length		136aa
2606548072	Ga0065883_1016	pfam16640	Big_3_5		2.7e-17
2606548072	Ga0065883_1016	Product_name		Ig-like domain (group 3)
2606548072	Ga0065883_1016	DNA_length		483bp
2606548072	Ga0065883_1016	Protein_length		160aa
2606548073	Ga0065883_1017	pfam01833	TIG		7.6e-12
2606548073	Ga0065883_1017	pfam01833	TIG		1.8e-11
2606548073	Ga0065883_1017	pfam01833	TIG		2.1e-08
2606548073	Ga0065883_1017	Product_name		IPT/TIG domain-containing protein
2606548073	Ga0065883_1017	DNA_length		807bp
2606548073	Ga0065883_1017	Protein_length		268aa
2606548074	Ga0065883_1018	pfam01833	TIG		1.1e-15
2606548074	Ga0065883_1018	pfam01833	TIG		7e-14
2606548074	Ga0065883_1018	pfam01833	TIG		1.3e-12
2606548074	Ga0065883_1018	Product_name		IPT/TIG domain-containing protein
2606548074	Ga0065883_1018	DNA_length		744bp
2606548074	Ga0065883_1018	Protein_length		247aa
2606548075	Ga0065883_1019	Product_name		hypothetical protein
2606548075	Ga0065883_1019	DNA_length		324bp
2606548075	Ga0065883_1019	Protein_length		107aa
2606548076	Ga0065883_10110	COG1819	UDP:flavonoid glycosyltransferase YjiC, YdhE family		5e-41
2606548076	Ga0065883_10110	pfam00201	UDPGT		5.6e-09
2606548076	Ga0065883_10110	pfam03033	Glyco_transf_28		7.6e-09
2606548076	Ga0065883_10110	Product_name		UDP:flavonoid glycosyltransferase YjiC, YdhE family
2606548076	Ga0065883_10110	DNA_length		1248bp
2606548076	Ga0065883_10110	Protein_length		415aa
2606548077	Ga0065883_10111	COG0627	S-formylglutathione hydrolase FrmB		5e-34
2606548077	Ga0065883_10111	pfam00756	Esterase		3.8e-40
2606548077	Ga0065883_10111	Product_name		S-formylglutathione hydrolase FrmB
2606548077	Ga0065883_10111	DNA_length		1014bp
2606548077	Ga0065883_10111	Protein_length		337aa
2606548078	Ga0065883_10112	Product_name		hypothetical protein
2606548078	Ga0065883_10112	DNA_length		969bp
2606548078	Ga0065883_10112	Protein_length		322aa
2606548079	Ga0065883_10113	COG2814	Predicted arabinose efflux permease, MFS family		4e-10
2606548079	Ga0065883_10113	pfam07690	MFS_1		2.4e-46
2606548079	Ga0065883_10113	TIGR00711	drug resistance transporter, EmrB/QacA subfamily		2.9e-67
2606548079	Ga0065883_10113	Product_name		drug resistance transporter, EmrB/QacA subfamily
2606548079	Ga0065883_10113	DNA_length		1434bp
2606548079	Ga0065883_10113	Protein_length		477aa
2606548080	Ga0065883_10114	COG0318	Acyl-CoA synthetase (AMP-forming)/AMP-acid ligase II		5e-73
2606548080	Ga0065883_10114	pfam00501	AMP-binding		1.3e-72
2606548080	Ga0065883_10114	Product_name		Acyl-CoA synthetase (AMP-forming)/AMP-acid ligase II
2606548080	Ga0065883_10114	DNA_length		1779bp
2606548080	Ga0065883_10114	Protein_length		592aa
2606548081	Ga0065883_10115	COG3321	Acyl transferase domain in polyketide synthase (PKS) enzymes		0
2606548081	Ga0065883_10115	pfam00109	ketoacyl-synt		7.5e-84
2606548081	Ga0065883_10115	pfam00550	PP-binding		3.1e-13
2606548081	Ga0065883_10115	pfam00550	PP-binding		5.6e-09
2606548081	Ga0065883_10115	pfam00698	Acyl_transf_1		3.5e-77
2606548081	Ga0065883_10115	pfam00975	Thioesterase		7.6e-26
2606548081	Ga0065883_10115	pfam02801	Ketoacyl-synt_C		1e-42
2606548081	Ga0065883_10115	pfam08659	KR		2.3e-60
2606548081	Ga0065883_10115	pfam16197	KAsynt_C_assoc		4.4e-20
2606548081	Ga0065883_10115	Product_name		phthiocerol/phenolphthiocerol synthesis type-I polyketide synthase D
2606548081	Ga0065883_10115	DNA_length		6699bp
2606548081	Ga0065883_10115	Protein_length		2232aa
2606548081	Ga0065883_10115	KO:K12443	phthiocerol/phenolphthiocerol synthesis type-I polyketide synthase D		0
2606548082	Ga0065883_10116	COG0604	NADPH:quinone reductase or related Zn-dependent oxidoreductase		7e-41
2606548082	Ga0065883_10116	pfam00107	ADH_zinc_N		1.2e-30
2606548082	Ga0065883_10116	pfam08240	ADH_N		8.5e-08
2606548082	Ga0065883_10116	EC:1.3.1.86	Crotonyl-CoA reductase.
2606548082	Ga0065883_10116	TIGR01751	crotonyl-CoA carboxylase/reductase		0
2606548082	Ga0065883_10116	Product_name		crotonyl-CoA carboxylase/reductase
2606548082	Ga0065883_10116	ITERM:06956		crotonyl-CoA carboxylase/reductase (EC 1.3.1.85)
2606548082	Ga0065883_10116	DNA_length		1323bp
2606548082	Ga0065883_10116	Protein_length		440aa
2606548082	Ga0065883_10116	KO:K17829	crotonyl-CoA reductase [EC:1.3.1.86]		0
2606548083	Ga0065883_10117	Product_name		hypothetical protein
2606548083	Ga0065883_10117	DNA_length		240bp
2606548083	Ga0065883_10117	Protein_length		79aa
2606548084	Ga0065883_10118	Product_name		hypothetical protein
2606548084	Ga0065883_10118	DNA_length		261bp
2606548084	Ga0065883_10118	Protein_length		86aa
2606548085	Ga0065883_10119	Product_name		hypothetical protein
2606548085	Ga0065883_10119	DNA_length		195bp
2606548085	Ga0065883_10119	Protein_length		64aa
2606548086	Ga0065883_10120	COG1011	FMN phosphatase YigB, HAD superfamily		4e-16
2606548086	Ga0065883_10120	pfam13419	HAD_2		9.4e-11
2606548086	Ga0065883_10120	TIGR01509	haloacid dehalogenase superfamily, subfamily IA, variant 3 with third motif having DD or ED		3.3e-16
2606548086	Ga0065883_10120	TIGR01549	haloacid dehalogenase superfamily, subfamily IA, variant 1 with third motif having Dx(3-4)D or Dx(3-4)E		2.4e-10
2606548086	Ga0065883_10120	Product_name		putative hydrolase of the HAD superfamily
2606548086	Ga0065883_10120	DNA_length		681bp
2606548086	Ga0065883_10120	Protein_length		226aa
2606548086	Ga0065883_10120	KO:K07025	putative hydrolase of the HAD superfamily		2.8e-121
2606548087	Ga0065883_10121	COG1484	DNA replication protein DnaC		3e-38
2606548087	Ga0065883_10121	pfam01695	IstB_IS21		6.1e-54
2606548087	Ga0065883_10121	Product_name		DNA replication protein DnaC
2606548087	Ga0065883_10121	DNA_length		795bp
2606548087	Ga0065883_10121	Protein_length		264aa
2606548088	Ga0065883_10122	pfam13701	DDE_Tnp_1_4		3.8e-59
2606548088	Ga0065883_10122	Product_name		Transposase DDE domain group 1
2606548088	Ga0065883_10122	DNA_length		1455bp
2606548088	Ga0065883_10122	Protein_length		484aa
2606548089	Ga0065883_10123	Product_name		hypothetical protein
2606548089	Ga0065883_10123	DNA_length		297bp
2606548089	Ga0065883_10123	Protein_length		98aa
2606548090	Ga0065883_10124	Product_name		hypothetical protein
2606548090	Ga0065883_10124	DNA_length		201bp
2606548090	Ga0065883_10124	Protein_length		66aa
2606548091	Ga0065883_10125	Product_name		hypothetical protein
2606548091	Ga0065883_10125	DNA_length		264bp
2606548091	Ga0065883_10125	Protein_length		87aa
2606548092	Ga0065883_10126	pfam13701	DDE_Tnp_1_4		2.7e-61
2606548092	Ga0065883_10126	Product_name		Transposase DDE domain group 1
2606548092	Ga0065883_10126	DNA_length		1206bp
2606548092	Ga0065883_10126	Protein_length		401aa
2606548093	Ga0065883_10127	COG1595	DNA-directed RNA polymerase specialized sigma subunit, sigma24 family		8e-19
2606548093	Ga0065883_10127	pfam04542	Sigma70_r2		1.2e-13
2606548093	Ga0065883_10127	pfam08281	Sigma70_r4_2		1.8e-12
2606548093	Ga0065883_10127	TIGR02957	RNA polymerase sigma-70 factor, TIGR02957 family		9.5e-105
2606548093	Ga0065883_10127	TIGR02937	RNA polymerase sigma factor, sigma-70 family		8.5e-26
2606548093	Ga0065883_10127	Product_name		RNA polymerase sigma-70 factor, ECF subfamily
2606548093	Ga0065883_10127	DNA_length		873bp
2606548093	Ga0065883_10127	Protein_length		290aa
2606548093	Ga0065883_10127	KO:K03088	RNA polymerase sigma-70 factor, ECF subfamily		0
2606548094	Ga0065883_10128	pfam02627	CMD		2.3e-05
2606548094	Ga0065883_10128	Product_name		Carboxymuconolactone decarboxylase family protein
2606548094	Ga0065883_10128	DNA_length		579bp
2606548094	Ga0065883_10128	Protein_length		192aa
2606548095	Ga0065883_10129	Product_name		hypothetical protein
2606548095	Ga0065883_10129	DNA_length		255bp
2606548095	Ga0065883_10129	Protein_length		84aa
2606548096	Ga0065883_10130	COG0388	Predicted amidohydrolase		3e-34
2606548096	Ga0065883_10130	pfam00795	CN_hydrolase		3.4e-44
2606548096	Ga0065883_10130	Product_name		Predicted amidohydrolase
2606548096	Ga0065883_10130	DNA_length		906bp
2606548096	Ga0065883_10130	Protein_length		301aa
2606548097	Ga0065883_10131	Product_name		hypothetical protein
2606548097	Ga0065883_10131	DNA_length		183bp
2606548097	Ga0065883_10131	Protein_length		60aa
2606548098	Ga0065883_10132	Product_name		hypothetical protein
2606548098	Ga0065883_10132	DNA_length		153bp
2606548098	Ga0065883_10132	Protein_length		50aa
2606548099	Ga0065883_10133	COG2610	H+/gluconate symporter or related permease		9e-76
2606548099	Ga0065883_10133	pfam02447	GntP_permease		1.2e-130
2606548099	Ga0065883_10133	TIGR00791	gluconate transporter		4.8e-122
2606548099	Ga0065883_10133	Product_name		gluconate:H+ symporter, GntP family
2606548099	Ga0065883_10133	DNA_length		1473bp
2606548099	Ga0065883_10133	Protein_length		490aa
2606548099	Ga0065883_10133	KO:K03299	gluconate:H+ symporter, GntP family		0
2606548100	Ga0065883_10134	COG3415	Transposase		0.0001
2606548100	Ga0065883_10134	pfam13358	DDE_3		1.1e-19
2606548100	Ga0065883_10134	pfam13551	HTH_29		2e-16
2606548100	Ga0065883_10134	Product_name		Transposase
2606548100	Ga0065883_10134	DNA_length		1089bp
2606548100	Ga0065883_10134	Protein_length		362aa
2606548101	Ga0065883_10135	COG3316	Transposase (or an inactivated derivative)		8e-51
2606548101	Ga0065883_10135	pfam13610	DDE_Tnp_IS240		4.1e-36
2606548101	Ga0065883_10135	Product_name		putative transposase
2606548101	Ga0065883_10135	DNA_length		720bp
2606548101	Ga0065883_10135	Protein_length		239aa
2606548101	Ga0065883_10135	KO:K07498	putative transposase		0
2606548102	Ga0065883_10136	COG0596	Pimeloyl-ACP methyl ester carboxylesterase		6e-16
2606548102	Ga0065883_10136	pfam12146	Hydrolase_4		6.7e-17
2606548102	Ga0065883_10136	Product_name		Pimeloyl-ACP methyl ester carboxylesterase
2606548102	Ga0065883_10136	DNA_length		819bp
2606548102	Ga0065883_10136	Protein_length		272aa
2606548103	Ga0065883_10137	pfam13610	DDE_Tnp_IS240		2.8e-32
2606548103	Ga0065883_10137	Product_name		putative transposase
2606548103	Ga0065883_10137	DNA_length		471bp
2606548103	Ga0065883_10137	Protein_length		156aa
2606548103	Ga0065883_10137	KO:K07498	putative transposase		2.4e-94
2606548104	Ga0065883_10138	Product_name		hypothetical protein
2606548104	Ga0065883_10138	DNA_length		369bp
2606548104	Ga0065883_10138	Protein_length		122aa
2606548105	Ga0065883_10139	pfam15595	Imm51		1.8e-11
2606548105	Ga0065883_10139	Product_name		Immunity protein 51
2606548105	Ga0065883_10139	DNA_length		345bp
2606548105	Ga0065883_10139	Protein_length		114aa
2606548106	Ga0065883_10140	pfam07751	Abi_2		4.3e-07
2606548106	Ga0065883_10140	Product_name		Abi-like protein
2606548106	Ga0065883_10140	DNA_length		630bp
2606548106	Ga0065883_10140	Protein_length		209aa
2606548107	Ga0065883_10141	pfam13855	LRR_8		1.3e-09
2606548107	Ga0065883_10141	Product_name		Leucine rich repeat-containing protein
2606548107	Ga0065883_10141	DNA_length		2343bp
2606548107	Ga0065883_10141	Protein_length		780aa
2606548108	Ga0065883_10142	Product_name		hypothetical protein
2606548108	Ga0065883_10142	DNA_length		321bp
2606548108	Ga0065883_10142	Protein_length		106aa
2606548109	Ga0065883_10143	Product_name		hypothetical protein
2606548109	Ga0065883_10143	DNA_length		183bp
2606548109	Ga0065883_10143	Protein_length		60aa
2606548110	Ga0065883_10144	Product_name		hypothetical protein
2606548110	Ga0065883_10144	DNA_length		165bp
2606548110	Ga0065883_10144	Protein_length		54aa
2606548111	Ga0065883_10145	Product_name		hypothetical protein
2606548111	Ga0065883_10145	DNA_length		342bp
2606548111	Ga0065883_10145	Protein_length		113aa
2606548112	Ga0065883_10146	COG1012	Acyl-CoA reductase or other NAD-dependent aldehyde dehydrogenase		2e-118
2606548112	Ga0065883_10146	pfam00171	Aldedh		0
2606548112	Ga0065883_10146	EC:1.2.1.3	Aldehyde dehydrogenase (NAD(+)).
2606548112	Ga0065883_10146	Product_name		aldehyde dehydrogenase (NAD+)
2606548112	Ga0065883_10146	DNA_length		1389bp
2606548112	Ga0065883_10146	Protein_length		462aa
2606548112	Ga0065883_10146	KO:K00128	aldehyde dehydrogenase (NAD+) [EC:1.2.1.3]		0
2606548113	Ga0065883_10147	pfam00005	ABC_tran		3.3e-06
2606548113	Ga0065883_10147	Product_name		ABC transporter
2606548113	Ga0065883_10147	DNA_length		342bp
2606548113	Ga0065883_10147	Protein_length		113aa
2606548114	Ga0065883_10148	COG1680	CubicO group peptidase, beta-lactamase class C family		3e-31
2606548114	Ga0065883_10148	pfam00144	Beta-lactamase		7.5e-40
2606548114	Ga0065883_10148	Product_name		hypothetical protein
2606548114	Ga0065883_10148	DNA_length		1161bp
2606548114	Ga0065883_10148	Protein_length		386aa
2606548115	Ga0065883_10149	COG1309	DNA-binding transcriptional regulator, AcrR family		9e-11
2606548115	Ga0065883_10149	pfam00440	TetR_N		1.3e-11
2606548115	Ga0065883_10149	Product_name		transcriptional regulator, TetR family
2606548115	Ga0065883_10149	ITERM:02313		transcriptional regulator, TetR family
2606548115	Ga0065883_10149	DNA_length		624bp
2606548115	Ga0065883_10149	Protein_length		207aa
2606548116	Ga0065883_10150	pfam13610	DDE_Tnp_IS240		1.6e-11
2606548116	Ga0065883_10150	Product_name		putative transposase
2606548116	Ga0065883_10150	DNA_length		330bp
2606548116	Ga0065883_10150	Protein_length		109aa
2606548116	Ga0065883_10150	KO:K07498	putative transposase		3.1e-66
2606548117	Ga0065883_10151	Product_name		hypothetical protein
2606548117	Ga0065883_10151	DNA_length		240bp
2606548117	Ga0065883_10151	Protein_length		79aa
2606548118	Ga0065883_10152	pfam00144	Beta-lactamase		1.6e-15
2606548118	Ga0065883_10152	EC:3.4.-	Hydrolases. Acting on peptide bonds (peptidases).
2606548118	Ga0065883_10152	Product_name		Beta-lactamase
2606548118	Ga0065883_10152	DNA_length		537bp
2606548118	Ga0065883_10152	Protein_length		178aa
2606548118	Ga0065883_10152	KO:K18988	D-alanyl-D-alanine-carboxypeptidase / D-alanyl-D-alanine-endopeptidase [EC:3.4.-.-]		7.9e-70
2606548119	Ga0065883_10153	pfam12710	HAD		2.9e-08
2606548119	Ga0065883_10153	Product_name		HAD-hyrolase-like
2606548119	Ga0065883_10153	DNA_length		414bp
2606548119	Ga0065883_10153	Protein_length		137aa
2606548120	Ga0065883_10154	Product_name		hypothetical protein
2606548120	Ga0065883_10154	DNA_length		552bp
2606548120	Ga0065883_10154	Protein_length		183aa
2606548121	Ga0065883_10155	Product_name		hypothetical protein
2606548121	Ga0065883_10155	DNA_length		972bp
2606548121	Ga0065883_10155	Protein_length		323aa
2606548122	Ga0065883_10156	pfam01548	DEDD_Tnp_IS110		2.9e-14
2606548122	Ga0065883_10156	Product_name		Transposase
2606548122	Ga0065883_10156	DNA_length		402bp
2606548122	Ga0065883_10156	Protein_length		133aa
2606548123	Ga0065883_10157	Product_name		hypothetical protein
2606548123	Ga0065883_10157	DNA_length		246bp
2606548123	Ga0065883_10157	Protein_length		81aa
2606548124	Ga0065883_10158	Product_name		hypothetical protein
2606548124	Ga0065883_10158	DNA_length		1842bp
2606548124	Ga0065883_10158	Protein_length		613aa
2606548125	Ga0065883_10159	COG0583	DNA-binding transcriptional regulator, LysR family		7e-28
2606548125	Ga0065883_10159	pfam00126	HTH_1		1.5e-19
2606548125	Ga0065883_10159	pfam03466	LysR_substrate		4.1e-28
2606548125	Ga0065883_10159	Product_name		DNA-binding transcriptional regulator, LysR family
2606548125	Ga0065883_10159	DNA_length		897bp
2606548125	Ga0065883_10159	Protein_length		298aa
2606548126	Ga0065883_10160	COG0388	Predicted amidohydrolase		3e-33
2606548126	Ga0065883_10160	pfam00795	CN_hydrolase		5.7e-29
2606548126	Ga0065883_10160	Product_name		Predicted amidohydrolase
2606548126	Ga0065883_10160	DNA_length		879bp
2606548126	Ga0065883_10160	Protein_length		292aa
2606548127	Ga0065883_10161	COG0531	Amino acid transporter		2e-31
2606548127	Ga0065883_10161	pfam13520	AA_permease_2		5.3e-36
2606548127	Ga0065883_10161	Product_name		Amino acid transporter
2606548127	Ga0065883_10161	DNA_length		1401bp
2606548127	Ga0065883_10161	Protein_length		466aa
2606548128	Ga0065883_10162	Product_name		hypothetical protein
2606548128	Ga0065883_10162	DNA_length		498bp
2606548128	Ga0065883_10162	Protein_length		165aa
2606548129	Ga0065883_10163	Product_name		hypothetical protein
2606548129	Ga0065883_10163	DNA_length		198bp
2606548129	Ga0065883_10163	Protein_length		65aa
2606548130	Ga0065883_10164	COG0583	DNA-binding transcriptional regulator, LysR family		3e-27
2606548130	Ga0065883_10164	pfam00126	HTH_1		5.1e-22
2606548130	Ga0065883_10164	pfam03466	LysR_substrate		4.2e-34
2606548130	Ga0065883_10164	Product_name		DNA-binding transcriptional regulator, LysR family
2606548130	Ga0065883_10164	DNA_length		1014bp
2606548130	Ga0065883_10164	Protein_length		337aa
2606548131	Ga0065883_10165	COG0624	Acetylornithine deacetylase/Succinyl-diaminopimelate desuccinylase or related deacylase		7e-31
2606548131	Ga0065883_10165	pfam01546	Peptidase_M20		7.6e-22
2606548131	Ga0065883_10165	pfam07687	M20_dimer		2.9e-14
2606548131	Ga0065883_10165	EC:3.4.17.11	Glutamate carboxypeptidase.
2606548131	Ga0065883_10165	Product_name		glutamate carboxypeptidase
2606548131	Ga0065883_10165	DNA_length		1146bp
2606548131	Ga0065883_10165	Protein_length		381aa
2606548131	Ga0065883_10165	KO:K01295	glutamate carboxypeptidase [EC:3.4.17.11]		0
2606548132	Ga0065883_10166	Product_name		hypothetical protein
2606548132	Ga0065883_10166	DNA_length		699bp
2606548132	Ga0065883_10166	Protein_length		232aa
2606548133	Ga0065883_10167	pfam00378	ECH_1		2.1e-13
2606548133	Ga0065883_10167	Product_name		Enoyl-CoA hydratase/isomerase
2606548133	Ga0065883_10167	DNA_length		474bp
2606548133	Ga0065883_10167	Protein_length		157aa
2606548134	Ga0065883_10168	Product_name		TniB protein
2606548134	Ga0065883_10168	DNA_length		711bp
2606548134	Ga0065883_10168	Protein_length		236aa
2606548135	Ga0065883_10169	COG3293	Transposase		0.002
2606548135	Ga0065883_10169	pfam13586	DDE_Tnp_1_2		9e-19
2606548135	Ga0065883_10169	Product_name		Transposase
2606548135	Ga0065883_10169	DNA_length		498bp
2606548135	Ga0065883_10169	Protein_length		165aa
2606548136	Ga0065883_10170	COG3293	Transposase		2e-09
2606548136	Ga0065883_10170	pfam13340	DUF4096		5.3e-23
2606548136	Ga0065883_10170	Product_name		Transposase
2606548136	Ga0065883_10170	DNA_length		486bp
2606548136	Ga0065883_10170	Protein_length		161aa
2606548137	Ga0065883_10171	Product_name		DDE superfamily endonuclease
2606548137	Ga0065883_10171	DNA_length		327bp
2606548137	Ga0065883_10171	Protein_length		108aa
2606548138	Ga0065883_10172	COG2801	Transposase InsO and inactivated derivatives		3e-15
2606548138	Ga0065883_10172	pfam00665	rve		2.6e-24
2606548138	Ga0065883_10172	pfam13276	HTH_21		1.6e-10
2606548138	Ga0065883_10172	Product_name		Transposase InsO and inactivated derivatives
2606548138	Ga0065883_10172	DNA_length		924bp
2606548138	Ga0065883_10172	Protein_length		307aa
2606548139	Ga0065883_10173	Product_name		hypothetical protein
2606548139	Ga0065883_10173	DNA_length		699bp
2606548139	Ga0065883_10173	Protein_length		232aa
2606548140	Ga0065883_10174	Product_name		hypothetical protein
2606548140	Ga0065883_10174	DNA_length		180bp
2606548140	Ga0065883_10174	Protein_length		59aa
2606548141	Ga0065883_10175	Product_name		hypothetical protein
2606548141	Ga0065883_10175	DNA_length		216bp
2606548141	Ga0065883_10175	Protein_length		71aa
2606548142	Ga0065883_10176	Product_name		hypothetical protein
2606548142	Ga0065883_10176	DNA_length		693bp
2606548142	Ga0065883_10176	Protein_length		230aa
2606548143	Ga0065883_10177	Product_name		hypothetical protein
2606548143	Ga0065883_10177	DNA_length		255bp
2606548143	Ga0065883_10177	Protein_length		84aa
2606548144	Ga0065883_10178	Product_name		hypothetical protein
2606548144	Ga0065883_10178	DNA_length		459bp
2606548144	Ga0065883_10178	Protein_length		152aa
2606548145	Ga0065883_10179	Product_name		hypothetical protein
2606548145	Ga0065883_10179	DNA_length		1056bp
2606548145	Ga0065883_10179	Protein_length		351aa
2606548146	Ga0065883_10180	pfam06439	DUF1080		1.2e-08
2606548146	Ga0065883_10180	Product_name		protein of unknown function (DUF1080)
2606548146	Ga0065883_10180	DNA_length		738bp
2606548146	Ga0065883_10180	Protein_length		245aa
2606548147	Ga0065883_10181	COG0381	UDP-N-acetylglucosamine 2-epimerase		2e-112
2606548147	Ga0065883_10181	pfam02350	Epimerase_2		6.4e-110
2606548147	Ga0065883_10181	EC:5.1.3.14	UDP-N-acetylglucosamine 2-epimerase (non-hydrolyzing).
2606548147	Ga0065883_10181	TIGR00236	UDP-N-acetylglucosamine 2-epimerase		0
2606548147	Ga0065883_10181	Product_name		UDP-N-Acetylglucosamine 2-epimerase (EC 5.1.3.14)
2606548147	Ga0065883_10181	DNA_length		1275bp
2606548147	Ga0065883_10181	Protein_length		424aa
2606548147	Ga0065883_10181	KO:K01791	UDP-N-acetylglucosamine 2-epimerase (non-hydrolysing) [EC:5.1.3.14]		0
2606548148	Ga0065883_10182	COG1215	Glycosyltransferase, catalytic subunit of cellulose synthase and poly-beta-1,6-N-acetylglucosamine synthase		3e-27
2606548148	Ga0065883_10182	pfam13641	Glyco_tranf_2_3		1.5e-25
2606548148	Ga0065883_10182	Product_name		Glycosyltransferase, catalytic subunit of cellulose synthase and poly-beta-1,6-N-acetylglucosamine synthase
2606548148	Ga0065883_10182	DNA_length		1242bp
2606548148	Ga0065883_10182	Protein_length		413aa
2606548149	Ga0065883_10183	Product_name		hypothetical protein
2606548149	Ga0065883_10183	DNA_length		243bp
2606548149	Ga0065883_10183	Protein_length		80aa
2606548150	Ga0065883_10184	COG5298	Uncharacterized protein YdaL		2e-30
2606548150	Ga0065883_10184	pfam10096	DUF2334		6.4e-59
2606548150	Ga0065883_10184	Product_name		Uncharacterized protein YdaL
2606548150	Ga0065883_10184	DNA_length		1848bp
2606548150	Ga0065883_10184	Protein_length		615aa
2606548151	Ga0065883_10185	Product_name		hypothetical protein
2606548151	Ga0065883_10185	DNA_length		1008bp
2606548151	Ga0065883_10185	Protein_length		335aa
2606548152	Ga0065883_10186	Product_name		hypothetical protein
2606548152	Ga0065883_10186	DNA_length		219bp
2606548152	Ga0065883_10186	Protein_length		72aa
2606548153	Ga0065883_10187	Product_name		hypothetical protein
2606548153	Ga0065883_10187	DNA_length		228bp
2606548153	Ga0065883_10187	Protein_length		75aa
2606548154	Ga0065883_10188	pfam00583	Acetyltransf_1		5e-06
2606548154	Ga0065883_10188	Product_name		Acetyltransferase (GNAT) family protein
2606548154	Ga0065883_10188	DNA_length		462bp
2606548154	Ga0065883_10188	Protein_length		153aa
2606548155	Ga0065883_10189	Product_name		hypothetical protein
2606548155	Ga0065883_10189	DNA_length		156bp
2606548155	Ga0065883_10189	Protein_length		51aa
2606548156	Ga0065883_10190	Product_name		hypothetical protein
2606548156	Ga0065883_10190	DNA_length		201bp
2606548156	Ga0065883_10190	Protein_length		66aa
2606548157	Ga0065883_10191	Product_name		hypothetical protein
2606548157	Ga0065883_10191	DNA_length		165bp
2606548157	Ga0065883_10191	Protein_length		54aa
2606548158	Ga0065883_10192	Product_name		hypothetical protein
2606548158	Ga0065883_10192	DNA_length		393bp
2606548158	Ga0065883_10192	Protein_length		130aa
2606548159	Ga0065883_10193	Product_name		hypothetical protein
2606548159	Ga0065883_10193	DNA_length		285bp
2606548159	Ga0065883_10193	Protein_length		94aa
2606548160	Ga0065883_10194	COG4899	Uncharacterized protein		9e-13
2606548160	Ga0065883_10194	pfam09965	DUF2199		3e-42
2606548160	Ga0065883_10194	Product_name		hypothetical protein
2606548160	Ga0065883_10194	DNA_length		468bp
2606548160	Ga0065883_10194	Protein_length		155aa
2606548161	Ga0065883_10195	Product_name		hypothetical protein
2606548161	Ga0065883_10195	DNA_length		666bp
2606548161	Ga0065883_10195	Protein_length		221aa
2606548162	Ga0065883_10196	Product_name		hypothetical protein
2606548162	Ga0065883_10196	DNA_length		564bp
2606548162	Ga0065883_10196	Protein_length		187aa
2606548163	Ga0065883_10197	Product_name		hypothetical protein
2606548163	Ga0065883_10197	DNA_length		279bp
2606548163	Ga0065883_10197	Protein_length		92aa
2606548164	Ga0065883_10198	pfam13701	DDE_Tnp_1_4		1e-72
2606548164	Ga0065883_10198	Product_name		transposase, IS4 family
2606548164	Ga0065883_10198	DNA_length		954bp
2606548164	Ga0065883_10198	Protein_length		317aa
2606548165	Ga0065883_10199	Product_name		hypothetical protein
2606548165	Ga0065883_10199	DNA_length		255bp
2606548165	Ga0065883_10199	Protein_length		84aa
2606548166	Ga0065883_101100	Product_name		hypothetical protein
2606548166	Ga0065883_101100	DNA_length		210bp
2606548166	Ga0065883_101100	Protein_length		69aa
2606548167	Ga0065883_101101	pfam13701	DDE_Tnp_1_4		2.3e-70
2606548167	Ga0065883_101101	Product_name		Transposase DDE domain group 1
2606548167	Ga0065883_101101	DNA_length		1404bp
2606548167	Ga0065883_101101	Protein_length		467aa
2606548168	Ga0065883_101102	pfam13340	DUF4096		1e-15
2606548168	Ga0065883_101102	Product_name		Putative transposase of IS4/5 family (DUF4096)
2606548168	Ga0065883_101102	DNA_length		249bp
2606548168	Ga0065883_101102	Protein_length		82aa
2606548169	Ga0065883_101103	pfam03572	Peptidase_S41		5.3e-20
2606548169	Ga0065883_101103	pfam11918	Peptidase_S41_N		6.1e-10
2606548169	Ga0065883_101103	Product_name		N-terminal domain of Peptidase_S41
2606548169	Ga0065883_101103	DNA_length		906bp
2606548169	Ga0065883_101103	Protein_length		301aa
2606548170	Ga0065883_101104	pfam12840	HTH_20		9.1e-16
2606548170	Ga0065883_101104	Product_name		Helix-turn-helix domain-containing protein
2606548170	Ga0065883_101104	DNA_length		543bp
2606548170	Ga0065883_101104	Protein_length		180aa
2606548171	Ga0065883_101105	Product_name		hypothetical protein
2606548171	Ga0065883_101105	DNA_length		1104bp
2606548171	Ga0065883_101105	Protein_length		367aa
2606548172	Ga0065883_101106	pfam00903	Glyoxalase		4.7e-06
2606548172	Ga0065883_101106	Product_name		Glyoxalase-like domain-containing protein
2606548172	Ga0065883_101106	DNA_length		387bp
2606548172	Ga0065883_101106	Protein_length		128aa
2606548173	Ga0065883_101107	pfam14016	DUF4232		1.2e-18
2606548173	Ga0065883_101107	Product_name		Protein of unknown function (DUF4232)
2606548173	Ga0065883_101107	DNA_length		675bp
2606548173	Ga0065883_101107	Protein_length		224aa
2606548174	Ga0065883_101108	Product_name		hypothetical protein
2606548174	Ga0065883_101108	DNA_length		855bp
2606548174	Ga0065883_101108	Protein_length		284aa
2606548175	Ga0065883_101109	pfam03572	Peptidase_S41		4.8e-23
2606548175	Ga0065883_101109	pfam14684	Tricorn_C1		3.9e-11
2606548175	Ga0065883_101109	Product_name		Tricorn protease C1 domain-containing protein
2606548175	Ga0065883_101109	DNA_length		1509bp
2606548175	Ga0065883_101109	Protein_length		502aa
2606548176	Ga0065883_101110	COG0640	DNA-binding transcriptional regulator, ArsR family		2e-05
2606548176	Ga0065883_101110	pfam12840	HTH_20		7.3e-12
2606548176	Ga0065883_101110	Product_name		DNA-binding transcriptional regulator, ArsR family
2606548176	Ga0065883_101110	DNA_length		447bp
2606548176	Ga0065883_101110	Protein_length		148aa
2606548177	Ga0065883_101111	pfam07690	MFS_1		2.2e-09
2606548177	Ga0065883_101111	Product_name		Major Facilitator Superfamily protein
2606548177	Ga0065883_101111	DNA_length		933bp
2606548177	Ga0065883_101111	Protein_length		310aa
2606548178	Ga0065883_101112	Product_name		hypothetical protein
2606548178	Ga0065883_101112	DNA_length		243bp
2606548178	Ga0065883_101112	Protein_length		80aa
2606548179	Ga0065883_101113	Product_name		hypothetical protein
2606548179	Ga0065883_101113	DNA_length		870bp
2606548179	Ga0065883_101113	Protein_length		289aa
2606548180	Ga0065883_101114	COG1961	Site-specific DNA recombinase related to the DNA invertase Pin		2e-18
2606548180	Ga0065883_101114	pfam00239	Resolvase		2.8e-28
2606548180	Ga0065883_101114	Product_name		Site-specific DNA recombinase
2606548180	Ga0065883_101114	DNA_length		978bp
2606548180	Ga0065883_101114	Protein_length		325aa
2606548181	Ga0065883_101115	Product_name		hypothetical protein
2606548181	Ga0065883_101115	DNA_length		207bp
2606548181	Ga0065883_101115	Protein_length		68aa
2606548182	Ga0065883_101116	Product_name		hypothetical protein
2606548182	Ga0065883_101116	DNA_length		489bp
2606548182	Ga0065883_101116	Protein_length		162aa
2606548183	Ga0065883_101117	Product_name		hypothetical protein
2606548183	Ga0065883_101117	DNA_length		234bp
2606548183	Ga0065883_101117	Protein_length		77aa
2606548184	Ga0065883_101118	pfam01526	DDE_Tnp_Tn3		1.3e-72
2606548184	Ga0065883_101118	Product_name		Tn3 transposase DDE domain-containing protein
2606548184	Ga0065883_101118	DNA_length		696bp
2606548184	Ga0065883_101118	Protein_length		231aa
2606548185	Ga0065883_101119	Product_name		hypothetical protein
2606548185	Ga0065883_101119	DNA_length		474bp
2606548185	Ga0065883_101119	Protein_length		157aa
2606548186	Ga0065883_101120	COG4974	Site-specific recombinase XerD		4e-19
2606548186	Ga0065883_101120	pfam00589	Phage_integrase		1.2e-20
2606548186	Ga0065883_101120	Product_name		Site-specific recombinase XerD
2606548186	Ga0065883_101120	DNA_length		2097bp
2606548186	Ga0065883_101120	Protein_length		698aa
2606548187	Ga0065883_101121	COG4974	Site-specific recombinase XerD		3e-20
2606548187	Ga0065883_101121	pfam00589	Phage_integrase		3.8e-27
2606548187	Ga0065883_101121	Product_name		Site-specific recombinase XerD
2606548187	Ga0065883_101121	DNA_length		882bp
2606548187	Ga0065883_101121	Protein_length		293aa
2606548188	Ga0065883_101122	pfam01526	DDE_Tnp_Tn3		7.9e-47
2606548188	Ga0065883_101122	pfam13700	DUF4158		2.1e-46
2606548188	Ga0065883_101122	Product_name		protein of unknown function (DUF4158)
2606548188	Ga0065883_101122	DNA_length		2556bp
2606548188	Ga0065883_101122	Protein_length		851aa
2606548189	Ga0065883_101123	pfam13489	Methyltransf_23		5.3e-13
2606548189	Ga0065883_101123	Product_name		Methyltransferase domain-containing protein
2606548189	Ga0065883_101123	DNA_length		795bp
2606548189	Ga0065883_101123	Protein_length		264aa
2606548190	Ga0065883_101124	Product_name		hypothetical protein
2606548190	Ga0065883_101124	DNA_length		1077bp
2606548190	Ga0065883_101124	Protein_length		358aa
2606548191	Ga0065883_101125	COG1595	DNA-directed RNA polymerase specialized sigma subunit, sigma24 family		8e-25
2606548191	Ga0065883_101125	pfam04542	Sigma70_r2		4.3e-15
2606548191	Ga0065883_101125	pfam08281	Sigma70_r4_2		7.1e-17
2606548191	Ga0065883_101125	TIGR02937	RNA polymerase sigma factor, sigma-70 family		9.3e-29
2606548191	Ga0065883_101125	Product_name		RNA polymerase sigma-70 factor, ECF subfamily
2606548191	Ga0065883_101125	DNA_length		690bp
2606548191	Ga0065883_101125	Protein_length		229aa
2606548191	Ga0065883_101125	KO:K03088	RNA polymerase sigma-70 factor, ECF subfamily		0
2606548192	Ga0065883_101126	Product_name		hypothetical protein
2606548192	Ga0065883_101126	DNA_length		222bp
2606548192	Ga0065883_101126	Protein_length		73aa
2606548193	Ga0065883_101127	Product_name		hypothetical protein
2606548193	Ga0065883_101127	DNA_length		1461bp
2606548193	Ga0065883_101127	Protein_length		486aa
2606548194	Ga0065883_101128	Product_name		hypothetical protein
2606548194	Ga0065883_101128	DNA_length		312bp
2606548194	Ga0065883_101128	Protein_length		103aa
2606548195	Ga0065883_101129	Product_name		hypothetical protein
2606548195	Ga0065883_101129	DNA_length		453bp
2606548195	Ga0065883_101129	Protein_length		150aa
2606548196	Ga0065883_101130	pfam01636	APH		5.2e-23
2606548196	Ga0065883_101130	Product_name		Phosphotransferase enzyme family protein
2606548196	Ga0065883_101130	DNA_length		951bp
2606548196	Ga0065883_101130	Protein_length		316aa
2606548197	Ga0065883_101131	Product_name		hypothetical protein
2606548197	Ga0065883_101131	DNA_length		486bp
2606548197	Ga0065883_101131	Protein_length		161aa
2606548198	Ga0065883_101132	pfam09339	HTH_IclR		7e-12
2606548198	Ga0065883_101132	pfam13490	zf-HC2		9.1e-07
2606548198	Ga0065883_101132	Product_name		Putative zinc-finger
2606548198	Ga0065883_101132	DNA_length		705bp
2606548198	Ga0065883_101132	Protein_length		234aa
2606548199	Ga0065883_101133	Product_name		hypothetical protein
2606548199	Ga0065883_101133	DNA_length		546bp
2606548199	Ga0065883_101133	Protein_length		181aa
2606548200	Ga0065883_101134	COG1309	DNA-binding transcriptional regulator, AcrR family		6e-07
2606548200	Ga0065883_101134	pfam00440	TetR_N		1.1e-09
2606548200	Ga0065883_101134	pfam13977	TetR_C_6		7.9e-09
2606548200	Ga0065883_101134	Product_name		transcriptional regulator, TetR family
2606548200	Ga0065883_101134	ITERM:02313		transcriptional regulator, TetR family
2606548200	Ga0065883_101134	DNA_length		627bp
2606548200	Ga0065883_101134	Protein_length		208aa
2606548201	Ga0065883_101135	COG1748	Saccharopine dehydrogenase, NADP-dependent		4e-08
2606548201	Ga0065883_101135	Product_name		Saccharopine dehydrogenase, NADP-dependent
2606548201	Ga0065883_101135	DNA_length		1110bp
2606548201	Ga0065883_101135	Protein_length		369aa
2606548202	Ga0065883_101136	Product_name		hypothetical protein
2606548202	Ga0065883_101136	DNA_length		366bp
2606548202	Ga0065883_101136	Protein_length		121aa
2606548203	Ga0065883_101137	Product_name		hypothetical protein
2606548203	Ga0065883_101137	DNA_length		702bp
2606548203	Ga0065883_101137	Protein_length		233aa
2606548204	Ga0065883_101138	Product_name		hypothetical protein
2606548204	Ga0065883_101138	DNA_length		897bp
2606548204	Ga0065883_101138	Protein_length		298aa
2606548205	Ga0065883_101139	Product_name		hypothetical protein
2606548205	Ga0065883_101139	DNA_length		216bp
2606548205	Ga0065883_101139	Protein_length		71aa
2606548206	Ga0065883_101140	Product_name		hypothetical protein
2606548206	Ga0065883_101140	DNA_length		387bp
2606548206	Ga0065883_101140	Protein_length		128aa
2606548207	Ga0065883_101141	Product_name		hypothetical protein
2606548207	Ga0065883_101141	DNA_length		720bp
2606548207	Ga0065883_101141	Protein_length		239aa
2606548208	Ga0065883_101142	pfam01636	APH		2.3e-09
2606548208	Ga0065883_101142	Product_name		Phosphotransferase enzyme family protein
2606548208	Ga0065883_101142	DNA_length		636bp
2606548208	Ga0065883_101142	Protein_length		211aa
2606548209	Ga0065883_101143	Product_name		hypothetical protein
2606548209	Ga0065883_101143	DNA_length		522bp
2606548209	Ga0065883_101143	Protein_length		173aa
2606548210	Ga0065883_101144	COG2350	Uncharacterized conserved protein YciI, contains a putative active-site phosphohistidine		4e-06
2606548210	Ga0065883_101144	pfam03795	YCII		5.9e-16
2606548210	Ga0065883_101144	Product_name		hypothetical protein
2606548210	Ga0065883_101144	DNA_length		552bp
2606548210	Ga0065883_101144	Protein_length		183aa
2606548210	Ga0065883_101144	KO:K09780	uncharacterized protein		5.8e-125
2606548211	Ga0065883_101145	COG0154	Asp-tRNAAsn/Glu-tRNAGln amidotransferase A subunit or related amidase		3e-90
2606548211	Ga0065883_101145	pfam01425	Amidase		1.4e-99
2606548211	Ga0065883_101145	EC:3.5.1.4	Amidase.
2606548211	Ga0065883_101145	Product_name		amidase
2606548211	Ga0065883_101145	DNA_length		1452bp
2606548211	Ga0065883_101145	Protein_length		483aa
2606548211	Ga0065883_101145	KO:K01426	amidase [EC:3.5.1.4]		0
2606548212	Ga0065883_101146	Product_name		hypothetical protein
2606548212	Ga0065883_101146	DNA_length		531bp
2606548212	Ga0065883_101146	Protein_length		176aa
2606548213	Ga0065883_101147	Product_name		hypothetical protein
2606548213	Ga0065883_101147	DNA_length		321bp
2606548213	Ga0065883_101147	Protein_length		106aa
2606548214	Ga0065883_101148	pfam13586	DDE_Tnp_1_2		9e-19
2606548214	Ga0065883_101148	Product_name		Transposase DDE domain-containing protein
2606548214	Ga0065883_101148	DNA_length		498bp
2606548214	Ga0065883_101148	Protein_length		165aa
2606548215	Ga0065883_101149	COG3293	Transposase		2e-09
2606548215	Ga0065883_101149	pfam13340	DUF4096		5.3e-23
2606548215	Ga0065883_101149	Product_name		Transposase
2606548215	Ga0065883_101149	DNA_length		486bp
2606548215	Ga0065883_101149	Protein_length		161aa
2606548216	Ga0065883_101150	pfam02698	DUF218		1e-15
2606548216	Ga0065883_101150	Product_name		DUF218 domain-containing protein
2606548216	Ga0065883_101150	DNA_length		477bp
2606548216	Ga0065883_101150	Protein_length		158aa
2606548217	Ga0065883_101151	Product_name		hypothetical protein
2606548217	Ga0065883_101151	DNA_length		204bp
2606548217	Ga0065883_101151	Protein_length		67aa
2606548218	Ga0065883_101152	pfam11139	SfLAP		7.2e-41
2606548218	Ga0065883_101152	Product_name		Sap, sulfolipid-1-addressing protein
2606548218	Ga0065883_101152	DNA_length		657bp
2606548218	Ga0065883_101152	Protein_length		218aa
2606548219	Ga0065883_101153	pfam06742	DUF1214		3.3e-35
2606548219	Ga0065883_101153	Product_name		Protein of unknown function (DUF1214)
2606548219	Ga0065883_101153	DNA_length		594bp
2606548219	Ga0065883_101153	Protein_length		197aa
2606548220	Ga0065883_101154	pfam01839	FG-GAP		7.6e-12
2606548220	Ga0065883_101154	pfam01839	FG-GAP		4e-06
2606548220	Ga0065883_101154	pfam01839	FG-GAP		5.1e-05
2606548220	Ga0065883_101154	pfam13517	VCBS		1.9e-08
2606548220	Ga0065883_101154	Product_name		FG-GAP repeat-containing protein
2606548220	Ga0065883_101154	DNA_length		1449bp
2606548220	Ga0065883_101154	Protein_length		482aa
2606548221	Ga0065883_101155	Product_name		hypothetical protein
2606548221	Ga0065883_101155	DNA_length		618bp
2606548221	Ga0065883_101155	Protein_length		205aa
2606548222	Ga0065883_101156	COG1051	ADP-ribose pyrophosphatase YjhB, NUDIX family		9e-12
2606548222	Ga0065883_101156	pfam00293	NUDIX		2.4e-14
2606548222	Ga0065883_101156	Product_name		ADP-ribose pyrophosphatase YjhB, NUDIX family
2606548222	Ga0065883_101156	DNA_length		510bp
2606548222	Ga0065883_101156	Protein_length		169aa
2606548223	Ga0065883_101157	COG0657	Acetyl esterase/lipase		4e-35
2606548223	Ga0065883_101157	pfam07859	Abhydrolase_3		1.4e-46
2606548223	Ga0065883_101157	Product_name		Acetyl esterase/lipase
2606548223	Ga0065883_101157	DNA_length		969bp
2606548223	Ga0065883_101157	Protein_length		322aa
2606548224	Ga0065883_101158	COG0654	2-polyprenyl-6-methoxyphenol hydroxylase and related FAD-dependent oxidoreductases		6e-24
2606548224	Ga0065883_101158	pfam01494	FAD_binding_3		4.6e-10
2606548224	Ga0065883_101158	pfam01494	FAD_binding_3		9.5e-06
2606548224	Ga0065883_101158	Product_name		2-polyprenyl-6-methoxyphenol hydroxylase
2606548224	Ga0065883_101158	DNA_length		1131bp
2606548224	Ga0065883_101158	Protein_length		376aa
2606548225	Ga0065883_101159	Product_name		hypothetical protein
2606548225	Ga0065883_101159	DNA_length		456bp
2606548225	Ga0065883_101159	Protein_length		151aa
2606548226	Ga0065883_101160	COG1309	DNA-binding transcriptional regulator, AcrR family		0.0007
2606548226	Ga0065883_101160	pfam00440	TetR_N		1.5e-06
2606548226	Ga0065883_101160	Product_name		transcriptional regulator, TetR family
2606548226	Ga0065883_101160	ITERM:02313		transcriptional regulator, TetR family
2606548226	Ga0065883_101160	DNA_length		666bp
2606548226	Ga0065883_101160	Protein_length		221aa
2606548227	Ga0065883_101161	COG1028	NAD(P)-dependent dehydrogenase, short-chain alcohol dehydrogenase family		7e-26
2606548227	Ga0065883_101161	pfam00106	adh_short		1.3e-27
2606548227	Ga0065883_101161	Product_name		NAD(P)-dependent dehydrogenase, short-chain alcohol dehydrogenase family
2606548227	Ga0065883_101161	DNA_length		924bp
2606548227	Ga0065883_101161	Protein_length		307aa
2606548228	Ga0065883_101162	pfam00353	HemolysinCabind		0.0016
2606548228	Ga0065883_101162	pfam00353	HemolysinCabind		0.013
2606548228	Ga0065883_101162	pfam00353	HemolysinCabind		0.67
2606548228	Ga0065883_101162	pfam00353	HemolysinCabind		1.8
2606548228	Ga0065883_101162	pfam00353	HemolysinCabind		31
2606548228	Ga0065883_101162	pfam00353	HemolysinCabind		65
2606548228	Ga0065883_101162	Product_name		Hemolysin-type calcium-binding repeat-containing protein
2606548228	Ga0065883_101162	DNA_length		774bp
2606548228	Ga0065883_101162	Protein_length		257aa
2606548229	Ga0065883_101163	pfam03067	LPMO_10		1.4e-15
2606548229	Ga0065883_101163	Product_name		chitin-binding protein
2606548229	Ga0065883_101163	DNA_length		516bp
2606548229	Ga0065883_101163	Protein_length		171aa
2606548229	Ga0065883_101163	KO:K03933	chitin-binding protein		3.2e-123
2606548230	Ga0065883_101164	pfam06736	DUF1211		5.1e-20
2606548230	Ga0065883_101164	Product_name		Protein of unknown function (DUF1211)
2606548230	Ga0065883_101164	DNA_length		696bp
2606548230	Ga0065883_101164	Protein_length		231aa
2606548231	Ga0065883_101165	Product_name		hypothetical protein
2606548231	Ga0065883_101165	DNA_length		345bp
2606548231	Ga0065883_101165	Protein_length		114aa
2606548232	Ga0065883_101166	Product_name		hypothetical protein
2606548232	Ga0065883_101166	DNA_length		198bp
2606548232	Ga0065883_101166	Protein_length		65aa
2606548233	Ga0065883_101167	Product_name		hypothetical protein
2606548233	Ga0065883_101167	DNA_length		447bp
2606548233	Ga0065883_101167	Protein_length		148aa
2606548234	Ga0065883_101168	Product_name		hypothetical protein
2606548234	Ga0065883_101168	DNA_length		1995bp
2606548234	Ga0065883_101168	Protein_length		664aa
2606548235	Ga0065883_101169	COG2124	Cytochrome P450		9e-52
2606548235	Ga0065883_101169	pfam00067	p450		8.7e-80
2606548235	Ga0065883_101169	EC:1.14.13.133	Pentalenene oxygenase.
2606548235	Ga0065883_101169	Product_name		pentalenene oxygenase
2606548235	Ga0065883_101169	DNA_length		1389bp
2606548235	Ga0065883_101169	Protein_length		462aa
2606548235	Ga0065883_101169	KO:K15907	pentalenene oxygenase [EC:1.14.13.133]		0
2606548236	Ga0065883_101170	Product_name		hypothetical protein
2606548236	Ga0065883_101170	DNA_length		330bp
2606548236	Ga0065883_101170	Protein_length		109aa
2606548237	Ga0065883_101171	Product_name		hypothetical protein
2606548237	Ga0065883_101171	DNA_length		276bp
2606548237	Ga0065883_101171	Protein_length		91aa
2606548238	Ga0065883_101172	COG1670	Protein N-acetyltransferase, RimJ/RimL family		1e-14
2606548238	Ga0065883_101172	pfam13302	Acetyltransf_3		2e-24
2606548238	Ga0065883_101172	Product_name		Protein N-acetyltransferase, RimJ/RimL family
2606548238	Ga0065883_101172	DNA_length		537bp
2606548238	Ga0065883_101172	Protein_length		178aa
2606548239	Ga0065883_101173	COG1262	Formylglycine-generating enzyme, required for sulfatase activity, contains SUMF1/FGE domain		3e-24
2606548239	Ga0065883_101173	pfam03781	FGE-sulfatase		3.2e-39
2606548239	Ga0065883_101173	Product_name		Formylglycine-generating enzyme, required for sulfatase activity, contains SUMF1/FGE domain
2606548239	Ga0065883_101173	DNA_length		651bp
2606548239	Ga0065883_101173	Protein_length		216aa
2606548240	Ga0065883_101174	Product_name		hypothetical protein
2606548240	Ga0065883_101174	DNA_length		153bp
2606548240	Ga0065883_101174	Protein_length		50aa
2606548241	Ga0065883_101175	Product_name		hypothetical protein
2606548241	Ga0065883_101175	DNA_length		273bp
2606548241	Ga0065883_101175	Protein_length		90aa
2606548242	Ga0065883_101176	pfam02518	HATPase_c		4.7e-07
2606548242	Ga0065883_101176	EC:5.99.1.3	DNA topoisomerase (ATP-hydrolyzing).
2606548242	Ga0065883_101176	Product_name		Histidine kinase-, DNA gyrase B-, and HSP90-like ATPase
2606548242	Ga0065883_101176	DNA_length		393bp
2606548242	Ga0065883_101176	Protein_length		130aa
2606548242	Ga0065883_101176	KO:K02470	DNA gyrase subunit B [EC:5.99.1.3]		1.4e-31
2606548243	Ga0065883_101177	pfam10604	Polyketide_cyc2		3.7e-06
2606548243	Ga0065883_101177	Product_name		Polyketide cyclase / dehydrase and lipid transport
2606548243	Ga0065883_101177	DNA_length		447bp
2606548243	Ga0065883_101177	Protein_length		148aa
2606548244	Ga0065883_101178	COG2207	AraC-type DNA-binding domain and AraC-containing proteins		1e-19
2606548244	Ga0065883_101178	pfam12833	HTH_18		6.1e-17
2606548244	Ga0065883_101178	pfam12852	Cupin_6		2.2e-52
2606548244	Ga0065883_101178	Product_name		AraC-type DNA-binding protein
2606548244	Ga0065883_101178	DNA_length		948bp
2606548244	Ga0065883_101178	Protein_length		315aa
2606548245	Ga0065883_101179	COG0702	Uncharacterized conserved protein YbjT, contains NAD(P)-binding and DUF2867 domains		4e-21
2606548245	Ga0065883_101179	pfam13460	NAD_binding_10		1.3e-12
2606548245	Ga0065883_101179	Product_name		Uncharacterized conserved protein YbjT, contains NAD(P)-binding and DUF2867 domains
2606548245	Ga0065883_101179	DNA_length		876bp
2606548245	Ga0065883_101179	Protein_length		291aa
2606548246	Ga0065883_101180	Product_name		hypothetical protein
2606548246	Ga0065883_101180	DNA_length		390bp
2606548246	Ga0065883_101180	Protein_length		129aa
2606548247	Ga0065883_101181	COG0702	Uncharacterized conserved protein YbjT, contains NAD(P)-binding and DUF2867 domains		1e-18
2606548247	Ga0065883_101181	pfam13460	NAD_binding_10		1.4e-22
2606548247	Ga0065883_101181	Product_name		Uncharacterized conserved protein YbjT, contains NAD(P)-binding and DUF2867 domains
2606548247	Ga0065883_101181	DNA_length		840bp
2606548247	Ga0065883_101181	Protein_length		279aa
2606548248	Ga0065883_101182	COG1733	DNA-binding transcriptional regulator, HxlR family		9e-21
2606548248	Ga0065883_101182	pfam01638	HxlR		8.6e-21
2606548248	Ga0065883_101182	Product_name		transcriptional regulator, HxlR family
2606548248	Ga0065883_101182	ITERM:02284		transcriptional regulator, HxlR family
2606548248	Ga0065883_101182	DNA_length		423bp
2606548248	Ga0065883_101182	Protein_length		140aa
2606548249	Ga0065883_101183	COG2771	DNA-binding transcriptional regulator, CsgD family		3e-08
2606548249	Ga0065883_101183	pfam00196	GerE		8.7e-10
2606548249	Ga0065883_101183	Product_name		DNA-binding transcriptional regulator, CsgD family
2606548249	Ga0065883_101183	DNA_length		1083bp
2606548249	Ga0065883_101183	Protein_length		360aa
2606548250	Ga0065883_101184	Product_name		hypothetical protein
2606548250	Ga0065883_101184	DNA_length		939bp
2606548250	Ga0065883_101184	Protein_length		312aa
2606548251	Ga0065883_101185	Product_name		hypothetical protein
2606548251	Ga0065883_101185	DNA_length		1314bp
2606548251	Ga0065883_101185	Protein_length		437aa
2606548252	Ga0065883_101186	pfam02661	Fic		4.5e-06
2606548252	Ga0065883_101186	Product_name		Fic/DOC family protein
2606548252	Ga0065883_101186	DNA_length		1476bp
2606548252	Ga0065883_101186	Protein_length		491aa
2606548253	Ga0065883_101187	Product_name		hypothetical protein
2606548253	Ga0065883_101187	DNA_length		132bp
2606548253	Ga0065883_101187	Protein_length		43aa
2606548254	Ga0065883_101188	Product_name		hypothetical protein
2606548254	Ga0065883_101188	DNA_length		684bp
2606548254	Ga0065883_101188	Protein_length		227aa
2606548255	Ga0065883_101189	Product_name		hypothetical protein
2606548255	Ga0065883_101189	DNA_length		519bp
2606548255	Ga0065883_101189	Protein_length		172aa
2606548256	Ga0065883_101190	Product_name		hypothetical protein
2606548256	Ga0065883_101190	DNA_length		162bp
2606548256	Ga0065883_101190	Protein_length		53aa
2606548257	Ga0065883_101191	pfam04471	Mrr_cat		1.5e-20
2606548257	Ga0065883_101191	Product_name		restriction system protein
2606548257	Ga0065883_101191	DNA_length		735bp
2606548257	Ga0065883_101191	Protein_length		244aa
2606548257	Ga0065883_101191	KO:K07448	restriction system protein		2.6e-126
2606548258	Ga0065883_101192	COG2320	GrpB domain, predicted nucleotidyltransferase, UPF0157 family		8e-26
2606548258	Ga0065883_101192	pfam04229	GrpB		3.4e-41
2606548258	Ga0065883_101192	Product_name		GrpB domain, predicted nucleotidyltransferase, UPF0157 family
2606548258	Ga0065883_101192	DNA_length		534bp
2606548258	Ga0065883_101192	Protein_length		177aa
2606548259	Ga0065883_101193	pfam03704	BTAD		4e-24
2606548259	Ga0065883_101193	Product_name		transcriptional activator domain-containing protein
2606548259	Ga0065883_101193	DNA_length		522bp
2606548259	Ga0065883_101193	Protein_length		173aa
2606548260	Ga0065883_101194	COG1335	Nicotinamidase-related amidase		1e-16
2606548260	Ga0065883_101194	pfam00857	Isochorismatase		4.6e-28
2606548260	Ga0065883_101194	Product_name		Nicotinamidase-related amidase
2606548260	Ga0065883_101194	DNA_length		585bp
2606548260	Ga0065883_101194	Protein_length		194aa
2606548261	Ga0065883_101195	COG3568	Metal-dependent hydrolase, endonuclease/exonuclease/phosphatase family		2e-09
2606548261	Ga0065883_101195	pfam03372	Exo_endo_phos		2.9e-12
2606548261	Ga0065883_101195	Product_name		vancomycin resistance protein VanJ
2606548261	Ga0065883_101195	DNA_length		1029bp
2606548261	Ga0065883_101195	Protein_length		342aa
2606548261	Ga0065883_101195	KO:K18353	vancomycin resistance protein VanJ		0
2606548262	Ga0065883_101196	pfam01433	Peptidase_M1		8.6e-28
2606548262	Ga0065883_101196	Product_name		Peptidase family M1
2606548262	Ga0065883_101196	DNA_length		1434bp
2606548262	Ga0065883_101196	Protein_length		477aa
2606548263	Ga0065883_101197	pfam04389	Peptidase_M28		1.7e-40
2606548263	Ga0065883_101197	EC:3.4.11.24	Aminopeptidase S.
2606548263	Ga0065883_101197	Product_name		Peptidase family M28
2606548263	Ga0065883_101197	DNA_length		897bp
2606548263	Ga0065883_101197	Protein_length		298aa
2606548263	Ga0065883_101197	KO:K19702	aminopeptidase S [EC:3.4.11.24]		2.8e-86
2606548264	Ga0065883_101198	COG0620	Methionine synthase II (cobalamin-independent)		1e-27
2606548264	Ga0065883_101198	pfam01717	Meth_synt_2		5e-12
2606548264	Ga0065883_101198	EC:2.1.1.14	5-methyltetrahydropteroyltriglutamate--homocysteine S-methyltransferase.
2606548264	Ga0065883_101198	Product_name		5-methyltetrahydropteroyltriglutamate--homocysteine methyltransferase
2606548264	Ga0065883_101198	DNA_length		1065bp
2606548264	Ga0065883_101198	Protein_length		354aa
2606548264	Ga0065883_101198	KO:K00549	5-methyltetrahydropteroyltriglutamate--homocysteine methyltransferase [EC:2.1.1.14]		0
2606548265	Ga0065883_101199	COG5646	Uncharacterized conserved protein YdhG, YjbR/CyaY-like superfamily, DUF1801 family		1e-07
2606548265	Ga0065883_101199	pfam08818	DUF1801		1.2e-15
2606548265	Ga0065883_101199	Product_name		Uncharacterized conserved protein YdhG, YjbR/CyaY-like superfamily, DUF1801 family
2606548265	Ga0065883_101199	DNA_length		369bp
2606548265	Ga0065883_101199	Protein_length		122aa
2606548266	Ga0065883_101200	COG0262	Dihydrofolate reductase		2e-12
2606548266	Ga0065883_101200	pfam01872	RibD_C		3.5e-35
2606548266	Ga0065883_101200	Product_name		Dihydrofolate reductase
2606548266	Ga0065883_101200	DNA_length		573bp
2606548266	Ga0065883_101200	Protein_length		190aa
2606548267	Ga0065883_101201	pfam14117	DUF4287		8e-24
2606548267	Ga0065883_101201	Product_name		protein of unknown function (DUF4287)
2606548267	Ga0065883_101201	DNA_length		294bp
2606548267	Ga0065883_101201	Protein_length		97aa
2606548268	Ga0065883_101202	pfam00083	Sugar_tr		7.4e-22
2606548268	Ga0065883_101202	pfam07690	MFS_1		6.1e-09
2606548268	Ga0065883_101202	Product_name		MFS transporter, MHS family, alpha-ketoglutarate permease
2606548268	Ga0065883_101202	DNA_length		1302bp
2606548268	Ga0065883_101202	Protein_length		433aa
2606548268	Ga0065883_101202	KO:K03761	MFS transporter, MHS family, alpha-ketoglutarate permease		0
2606548269	Ga0065883_101203	COG2128	Alkylhydroperoxidase family enzyme, contains CxxC motif		4e-08
2606548269	Ga0065883_101203	pfam02627	CMD		3.1e-07
2606548269	Ga0065883_101203	TIGR01926	uncharacterized peroxidase-related enzyme		9.3e-24
2606548269	Ga0065883_101203	TIGR00778	alkylhydroperoxidase AhpD family core domain		3.3e-09
2606548269	Ga0065883_101203	Product_name		uncharacterized peroxidase-related enzyme
2606548269	Ga0065883_101203	DNA_length		540bp
2606548269	Ga0065883_101203	Protein_length		179aa
2606548270	Ga0065883_101204	pfam00438	S-AdoMet_synt_N		1.1e-13
2606548270	Ga0065883_101204	Product_name		S-adenosylmethionine synthetase, N-terminal domain
2606548270	Ga0065883_101204	DNA_length		336bp
2606548270	Ga0065883_101204	Protein_length		111aa
2606548271	Ga0065883_101205	pfam00960	Neocarzinostat		4.4e-26
2606548271	Ga0065883_101205	Product_name		Neocarzinostatin family protein
2606548271	Ga0065883_101205	DNA_length		441bp
2606548271	Ga0065883_101205	Protein_length		146aa
2606548272	Ga0065883_101206	pfam07690	MFS_1		1.3e-41
2606548272	Ga0065883_101206	Product_name		MFS transporter, DHA2 family, multidrug resistance protein
2606548272	Ga0065883_101206	DNA_length		1656bp
2606548272	Ga0065883_101206	Protein_length		551aa
2606548272	Ga0065883_101206	KO:K08167	MFS transporter, DHA2 family, multidrug resistance protein		0
2606548273	Ga0065883_101207	pfam01565	FAD_binding_4		3.4e-17
2606548273	Ga0065883_101207	Product_name		FAD binding domain-containing protein
2606548273	Ga0065883_101207	DNA_length		1383bp
2606548273	Ga0065883_101207	Protein_length		460aa
2606548274	Ga0065883_101208	pfam13649	Methyltransf_25		6.4e-15
2606548274	Ga0065883_101208	Product_name		Methyltransferase domain-containing protein
2606548274	Ga0065883_101208	DNA_length		1548bp
2606548274	Ga0065883_101208	Protein_length		515aa
2606548275	Ga0065883_101209	COG0596	Pimeloyl-ACP methyl ester carboxylesterase		6e-08
2606548275	Ga0065883_101209	pfam06441	EHN		1.9e-35
2606548275	Ga0065883_101209	Product_name		epoxide hydrolase
2606548275	Ga0065883_101209	DNA_length		1173bp
2606548275	Ga0065883_101209	Protein_length		390aa
2606548276	Ga0065883_101210	COG1653	ABC-type glycerol-3-phosphate transport system, periplasmic component		2e-27
2606548276	Ga0065883_101210	pfam13416	SBP_bac_8		6.3e-32
2606548276	Ga0065883_101210	Product_name		carbohydrate ABC transporter substrate-binding protein, CUT1 family (TC 3.A.1.1.-)
2606548276	Ga0065883_101210	DNA_length		1410bp
2606548276	Ga0065883_101210	Protein_length		469aa
2606548276	Ga0065883_101210	KO:K05813	sn-glycerol 3-phosphate transport system substrate-binding protein		0
2606548277	Ga0065883_101211	Product_name		hypothetical protein
2606548277	Ga0065883_101211	DNA_length		270bp
2606548277	Ga0065883_101211	Protein_length		89aa
2606548278	Ga0065883_101212	COG1541	Phenylacetate-coenzyme A ligase PaaK, adenylate-forming domain family		9e-72
2606548278	Ga0065883_101212	pfam00501	AMP-binding		2e-10
2606548278	Ga0065883_101212	pfam14535	AMP-binding_C_2		1.3e-12
2606548278	Ga0065883_101212	EC:6.2.1.30	Phenylacetate--CoA ligase.
2606548278	Ga0065883_101212	Product_name		phenylacetate-CoA ligase
2606548278	Ga0065883_101212	DNA_length		1311bp
2606548278	Ga0065883_101212	Protein_length		436aa
2606548278	Ga0065883_101212	KO:K01912	phenylacetate-CoA ligase [EC:6.2.1.30]		1.3e-102
2606548279	Ga0065883_101213	COG0512	Anthranilate/para-aminobenzoate synthase component II		1e-65
2606548279	Ga0065883_101213	pfam00117	GATase		1.5e-47
2606548279	Ga0065883_101213	EC:4.1.3.27	Anthranilate synthase.
2606548279	Ga0065883_101213	TIGR00566	glutamine amidotransferase of anthranilate synthase or aminodeoxychorismate synthase		6.1e-61
2606548279	Ga0065883_101213	Product_name		anthranilate synthase, component II
2606548279	Ga0065883_101213	ITERM:00358		anthranilate synthase, component II (EC 4.1.3.27)
2606548279	Ga0065883_101213	DNA_length		657bp
2606548279	Ga0065883_101213	Protein_length		218aa
2606548279	Ga0065883_101213	KO:K01658	anthranilate synthase component II [EC:4.1.3.27]		2.6e-75
2606548280	Ga0065883_101214	COG0147	Anthranilate/para-aminobenzoate synthases component I		3e-105
2606548280	Ga0065883_101214	pfam00425	Chorismate_bind		1.1e-86
2606548280	Ga0065883_101214	pfam04715	Anth_synt_I_N		1.1e-10
2606548280	Ga0065883_101214	EC:4.1.3.27	Anthranilate synthase.
2606548280	Ga0065883_101214	Product_name		anthranilate synthase component 1
2606548280	Ga0065883_101214	DNA_length		1482bp
2606548280	Ga0065883_101214	Protein_length		493aa
2606548280	Ga0065883_101214	KO:K01657	anthranilate synthase component I [EC:4.1.3.27]		0
2606548281	Ga0065883_101215	COG1541	Phenylacetate-coenzyme A ligase PaaK, adenylate-forming domain family		2e-63
2606548281	Ga0065883_101215	pfam00501	AMP-binding		7.2e-07
2606548281	Ga0065883_101215	EC:6.2.1.30	Phenylacetate--CoA ligase.
2606548281	Ga0065883_101215	Product_name		phenylacetate-CoA ligase
2606548281	Ga0065883_101215	DNA_length		1425bp
2606548281	Ga0065883_101215	Protein_length		474aa
2606548281	Ga0065883_101215	KO:K01912	phenylacetate-CoA ligase [EC:6.2.1.30]		0
2606548282	Ga0065883_101216	COG0655	Multimeric flavodoxin WrbA		4e-21
2606548282	Ga0065883_101216	pfam03358	FMN_red		2.6e-22
2606548282	Ga0065883_101216	Product_name		Multimeric flavodoxin WrbA
2606548282	Ga0065883_101216	DNA_length		750bp
2606548282	Ga0065883_101216	Protein_length		249aa
2606548283	Ga0065883_101217	COG2124	Cytochrome P450		4e-64
2606548283	Ga0065883_101217	pfam00067	p450		6.7e-21
2606548283	Ga0065883_101217	pfam00067	p450		3.1e-09
2606548283	Ga0065883_101217	Product_name		Cytochrome P450
2606548283	Ga0065883_101217	DNA_length		1236bp
2606548283	Ga0065883_101217	Protein_length		411aa
2606548284	Ga0065883_101218	pfam00891	Methyltransf_2		5.5e-40
2606548284	Ga0065883_101218	Product_name		O-methyltransferase
2606548284	Ga0065883_101218	DNA_length		1053bp
2606548284	Ga0065883_101218	Protein_length		350aa
2606548285	Ga0065883_101219	COG2409	Uncharacterized membrane protein YdfJ, MMPL/SSD domain		9e-61
2606548285	Ga0065883_101219	pfam03176	MMPL		5.6e-67
2606548285	Ga0065883_101219	pfam03176	MMPL		1.1e-51
2606548285	Ga0065883_101219	TIGR00833	Transport protein		1.6e-86
2606548285	Ga0065883_101219	Product_name		putative drug exporter of the RND superfamily
2606548285	Ga0065883_101219	DNA_length		2106bp
2606548285	Ga0065883_101219	Protein_length		701aa
2606548285	Ga0065883_101219	KO:K06994	putative drug exporter of the RND superfamily		0
2606548286	Ga0065883_101220	COG0596	Pimeloyl-ACP methyl ester carboxylesterase		4e-08
2606548286	Ga0065883_101220	pfam12697	Abhydrolase_6		3.1e-13
2606548286	Ga0065883_101220	Product_name		Pimeloyl-ACP methyl ester carboxylesterase
2606548286	Ga0065883_101220	DNA_length		783bp
2606548286	Ga0065883_101220	Protein_length		260aa
2606548287	Ga0065883_101221	COG1835	Peptidoglycan/LPS O-acetylase OafA/YrhL, contains acyltransferase and SGNH-hydrolase domains		2e-18
2606548287	Ga0065883_101221	pfam01757	Acyl_transf_3		1.3e-24
2606548287	Ga0065883_101221	Product_name		Peptidoglycan/LPS O-acetylase OafA/YrhL, contains acyltransferase and SGNH-hydrolase domains
2606548287	Ga0065883_101221	DNA_length		1320bp
2606548287	Ga0065883_101221	Protein_length		439aa
2606548288	Ga0065883_101222	Product_name		hypothetical protein
2606548288	Ga0065883_101222	DNA_length		327bp
2606548288	Ga0065883_101222	Protein_length		108aa
2606548289	Ga0065883_101223	COG0654	2-polyprenyl-6-methoxyphenol hydroxylase and related FAD-dependent oxidoreductases		1e-33
2606548289	Ga0065883_101223	pfam01494	FAD_binding_3		4e-20
2606548289	Ga0065883_101223	pfam03358	FMN_red		1.7e-25
2606548289	Ga0065883_101223	EC:1.14.13.1	Salicylate 1-monooxygenase.
2606548289	Ga0065883_101223	Product_name		2-polyprenyl-6-methoxyphenol hydroxylase
2606548289	Ga0065883_101223	DNA_length		1977bp
2606548289	Ga0065883_101223	Protein_length		658aa
2606548289	Ga0065883_101223	KO:K00480	salicylate hydroxylase [EC:1.14.13.1]		0
2606548290	Ga0065883_101224	COG0044	Dihydroorotase or related cyclic amidohydrolase		1e-95
2606548290	Ga0065883_101224	pfam01979	Amidohydro_1		1e-27
2606548290	Ga0065883_101224	EC:3.5.2.3	Dihydroorotase.
2606548290	Ga0065883_101224	TIGR00857	dihydroorotase, multifunctional complex type		1.5e-88
2606548290	Ga0065883_101224	Product_name		dihydroorotase
2606548290	Ga0065883_101224	DNA_length		1425bp
2606548290	Ga0065883_101224	Protein_length		474aa
2606548290	Ga0065883_101224	KO:K01465	dihydroorotase [EC:3.5.2.3]		0
2606548291	Ga0065883_101225	COG1960	Acyl-CoA dehydrogenase related to the alkylation response protein AidB		3e-41
2606548291	Ga0065883_101225	pfam00441	Acyl-CoA_dh_1		4.6e-14
2606548291	Ga0065883_101225	pfam02770	Acyl-CoA_dh_M		1.5e-12
2606548291	Ga0065883_101225	pfam02771	Acyl-CoA_dh_N		6e-15
2606548291	Ga0065883_101225	Product_name		hypothetical protein
2606548291	Ga0065883_101225	DNA_length		1128bp
2606548291	Ga0065883_101225	Protein_length		375aa
2606548292	Ga0065883_101226	COG2828	2-Methylaconitate cis-trans-isomerase PrpF (2-methyl citrate pathway)		4e-17
2606548292	Ga0065883_101226	pfam04303	PrpF		1.5e-17
2606548292	Ga0065883_101226	Product_name		hypothetical protein
2606548292	Ga0065883_101226	DNA_length		1065bp
2606548292	Ga0065883_101226	Protein_length		354aa
2606548292	Ga0065883_101226	KO:K09788	uncharacterized protein		0
2606548293	Ga0065883_101227	COG0367	Asparagine synthetase B (glutamine-hydrolyzing)		5e-81
2606548293	Ga0065883_101227	pfam00733	Asn_synthase		2.9e-71
2606548293	Ga0065883_101227	pfam13537	GATase_7		7.1e-33
2606548293	Ga0065883_101227	EC:6.3.5.4	Asparagine synthase (glutamine-hydrolyzing).
2606548293	Ga0065883_101227	TIGR01536	asparagine synthase (glutamine-hydrolyzing)		1e-103
2606548293	Ga0065883_101227	Product_name		asparagine synthase (glutamine-hydrolysing)
2606548293	Ga0065883_101227	DNA_length		1821bp
2606548293	Ga0065883_101227	Protein_length		606aa
2606548293	Ga0065883_101227	KO:K01953	asparagine synthase (glutamine-hydrolysing) [EC:6.3.5.4]		0
2606548294	Ga0065883_101228	COG0031	Cysteine synthase		1e-92
2606548294	Ga0065883_101228	pfam00291	PALP		2.2e-64
2606548294	Ga0065883_101228	EC:2.5.1.47	Cysteine synthase.
2606548294	Ga0065883_101228	Product_name		cysteine synthase A
2606548294	Ga0065883_101228	DNA_length		942bp
2606548294	Ga0065883_101228	Protein_length		313aa
2606548294	Ga0065883_101228	KO:K01738	cysteine synthase A [EC:2.5.1.47]		0
2606548295	Ga0065883_101229	COG3836	2-keto-3-deoxy-L-rhamnonate aldolase RhmA		7e-40
2606548295	Ga0065883_101229	pfam03328	HpcH_HpaI		9.6e-32
2606548295	Ga0065883_101229	EC:4.1.2.52	4-hydroxy-2-oxoheptanedioate aldolase.
2606548295	Ga0065883_101229	Product_name		4-hydroxy-2-oxoheptanedioate aldolase
2606548295	Ga0065883_101229	DNA_length		798bp
2606548295	Ga0065883_101229	Protein_length		265aa
2606548295	Ga0065883_101229	KO:K02510	4-hydroxy-2-oxoheptanedioate aldolase [EC:4.1.2.52]		0
2606548296	Ga0065883_101230	COG2175	Taurine dioxygenase, alpha-ketoglutarate-dependent		3e-55
2606548296	Ga0065883_101230	pfam02668	TauD		7.8e-58
2606548296	Ga0065883_101230	EC:1.14.11.17	Taurine dioxygenase.
2606548296	Ga0065883_101230	Product_name		taurine dioxygenase
2606548296	Ga0065883_101230	DNA_length		861bp
2606548296	Ga0065883_101230	Protein_length		286aa
2606548296	Ga0065883_101230	KO:K03119	taurine dioxygenase [EC:1.14.11.17]		0
2606548297	Ga0065883_101231	pfam07690	MFS_1		4.4e-22
2606548297	Ga0065883_101231	Product_name		MFS transporter, DHA1 family, multidrug resistance protein B
2606548297	Ga0065883_101231	DNA_length		1269bp
2606548297	Ga0065883_101231	Protein_length		422aa
2606548297	Ga0065883_101231	KO:K08152	MFS transporter, DHA1 family, multidrug resistance protein B		0
2606548298	Ga0065883_101232	pfam13535	ATP-grasp_4		5.3e-16
2606548298	Ga0065883_101232	EC:2.5.1.47	Cysteine synthase.
2606548298	Ga0065883_101232	Product_name		ATP-grasp domain-containing protein
2606548298	Ga0065883_101232	DNA_length		1257bp
2606548298	Ga0065883_101232	Protein_length		418aa
2606548298	Ga0065883_101232	KO:K01738	cysteine synthase A [EC:2.5.1.47]		1.6e-50
2606548299	Ga0065883_101233	COG0439	Biotin carboxylase		4e-22
2606548299	Ga0065883_101233	pfam13535	ATP-grasp_4		4e-23
2606548299	Ga0065883_101233	Product_name		Biotin carboxylase
2606548299	Ga0065883_101233	DNA_length		1284bp
2606548299	Ga0065883_101233	Protein_length		427aa
2606548300	Ga0065883_101234	COG1045	Serine acetyltransferase		4e-43
2606548300	Ga0065883_101234	pfam00132	Hexapep		5.6e-09
2606548300	Ga0065883_101234	EC:2.3.1.30	Serine O-acetyltransferase.
2606548300	Ga0065883_101234	TIGR01172	serine O-acetyltransferase		3.9e-55
2606548300	Ga0065883_101234	Product_name		serine O-acetyltransferase
2606548300	Ga0065883_101234	DNA_length		603bp
2606548300	Ga0065883_101234	Protein_length		200aa
2606548300	Ga0065883_101234	KO:K00640	serine O-acetyltransferase [EC:2.3.1.30]		4.5e-92
2606548301	Ga0065883_101235	COG0031	Cysteine synthase		2e-102
2606548301	Ga0065883_101235	pfam00291	PALP		4.4e-73
2606548301	Ga0065883_101235	EC:2.5.1.47	Cysteine synthase.
2606548301	Ga0065883_101235	TIGR01136	cysteine synthase		3.9e-110
2606548301	Ga0065883_101235	TIGR01139	cysteine synthase A		6.8e-109
2606548301	Ga0065883_101235	Product_name		cysteine synthase A
2606548301	Ga0065883_101235	DNA_length		948bp
2606548301	Ga0065883_101235	Protein_length		315aa
2606548301	Ga0065883_101235	KO:K01738	cysteine synthase A [EC:2.5.1.47]		0
2606548302	Ga0065883_101236	Product_name		ATP-grasp domain-containing protein
2606548302	Ga0065883_101236	DNA_length		1242bp
2606548302	Ga0065883_101236	Protein_length		413aa
2606548303	Ga0065883_101237	pfam00501	AMP-binding		1.7e-82
2606548303	Ga0065883_101237	pfam00550	PP-binding		9.6e-18
2606548303	Ga0065883_101237	pfam13193	AMP-binding_C		1.3e-12
2606548303	Ga0065883_101237	TIGR01733	amino acid adenylation domain		9.5e-115
2606548303	Ga0065883_101237	Product_name		amino acid adenylation domain-containing protein
2606548303	Ga0065883_101237	DNA_length		1773bp
2606548303	Ga0065883_101237	Protein_length		590aa
2606548304	Ga0065883_101238	pfam00668	Condensation		2.1e-50
2606548304	Ga0065883_101238	Product_name		Condensation domain-containing protein
2606548304	Ga0065883_101238	DNA_length		1374bp
2606548304	Ga0065883_101238	Protein_length		457aa
2606548305	Ga0065883_101239	COG1960	Acyl-CoA dehydrogenase related to the alkylation response protein AidB		3e-27
2606548305	Ga0065883_101239	pfam02771	Acyl-CoA_dh_N		1.1e-07
2606548305	Ga0065883_101239	pfam08028	Acyl-CoA_dh_2		3.3e-20
2606548305	Ga0065883_101239	EC:1.14.14.12	3-hydroxy-9,10-secoandrosta-1,3,5(10)-triene-9,17-dione monooxygenase.
2606548305	Ga0065883_101239	Product_name		3-hydroxy-9,10-secoandrosta-1,3,5(10)-triene-9,17-dione monooxygenase
2606548305	Ga0065883_101239	DNA_length		1242bp
2606548305	Ga0065883_101239	Protein_length		413aa
2606548305	Ga0065883_101239	KO:K16047	3-hydroxy-9,10-secoandrosta-1,3,5(10)-triene-9,17-dione monooxygenase [EC:1.14.14.12]		0
2606548306	Ga0065883_101240	COG2124	Cytochrome P450		3e-62
2606548306	Ga0065883_101240	pfam00067	p450		1.2e-19
2606548306	Ga0065883_101240	Product_name		Cytochrome P450
2606548306	Ga0065883_101240	DNA_length		1245bp
2606548306	Ga0065883_101240	Protein_length		414aa
2606548307	Ga0065883_101241	COG0654	2-polyprenyl-6-methoxyphenol hydroxylase and related FAD-dependent oxidoreductases		8e-10
2606548307	Ga0065883_101241	Product_name		2-polyprenyl-6-methoxyphenol hydroxylase
2606548307	Ga0065883_101241	DNA_length		1350bp
2606548307	Ga0065883_101241	Protein_length		449aa
2606548308	Ga0065883_101242	pfam14534	DUF4440		4.5e-09
2606548308	Ga0065883_101242	TIGR02246	conserved hypothetical protein		7.2e-42
2606548308	Ga0065883_101242	Product_name		conserved hypothetical protein
2606548308	Ga0065883_101242	DNA_length		432bp
2606548308	Ga0065883_101242	Protein_length		143aa
2606548309	Ga0065883_101243	COG1960	Acyl-CoA dehydrogenase related to the alkylation response protein AidB		1e-21
2606548309	Ga0065883_101243	pfam02771	Acyl-CoA_dh_N		2.1e-07
2606548309	Ga0065883_101243	pfam08028	Acyl-CoA_dh_2		7.7e-24
2606548309	Ga0065883_101243	Product_name		Acyl-CoA dehydrogenase
2606548309	Ga0065883_101243	DNA_length		1182bp
2606548309	Ga0065883_101243	Protein_length		393aa
2606548310	Ga0065883_101244	COG2368	Aromatic ring hydroxylase		0
2606548310	Ga0065883_101244	pfam03241	HpaB		2.7e-72
2606548310	Ga0065883_101244	pfam11794	HpaB_N		4.4e-95
2606548310	Ga0065883_101244	EC:1.14.14.9	4-hydroxyphenylacetate 3-monooxygenase.
2606548310	Ga0065883_101244	Product_name		4-hydroxyphenylacetate 3-monooxygenase oxygenase component
2606548310	Ga0065883_101244	ITERM:05360		4-hydroxyphenylacetate 3-monooxygenase oxygenase component (EC 1.14.13.3)
2606548310	Ga0065883_101244	DNA_length		1584bp
2606548310	Ga0065883_101244	Protein_length		527aa
2606548310	Ga0065883_101244	KO:K00483	4-hydroxyphenylacetate 3-monooxygenase [EC:1.14.14.9]		0
2606548311	Ga0065883_101245	COG0028	Acetolactate synthase large subunit or other thiamine pyrophosphate-requiring enzyme		1e-77
2606548311	Ga0065883_101245	pfam00205	TPP_enzyme_M		1.6e-19
2606548311	Ga0065883_101245	pfam02775	TPP_enzyme_C		2.3e-22
2606548311	Ga0065883_101245	pfam02776	TPP_enzyme_N		1.2e-35
2606548311	Ga0065883_101245	Product_name		Acetolactate synthase large subunit
2606548311	Ga0065883_101245	DNA_length		1671bp
2606548311	Ga0065883_101245	Protein_length		556aa
2606548312	Ga0065883_101246	pfam13649	Methyltransf_25		1.6e-13
2606548312	Ga0065883_101246	Product_name		Methyltransferase domain-containing protein
2606548312	Ga0065883_101246	DNA_length		1014bp
2606548312	Ga0065883_101246	Protein_length		337aa
2606548313	Ga0065883_101247	Product_name		hypothetical protein
2606548313	Ga0065883_101247	DNA_length		183bp
2606548313	Ga0065883_101247	Protein_length		60aa
2606548314	Ga0065883_101248	COG2128	Alkylhydroperoxidase family enzyme, contains CxxC motif		3e-07
2606548314	Ga0065883_101248	pfam02627	CMD		6.6e-07
2606548314	Ga0065883_101248	TIGR01926	uncharacterized peroxidase-related enzyme		2.9e-26
2606548314	Ga0065883_101248	TIGR00778	alkylhydroperoxidase AhpD family core domain		3.8e-08
2606548314	Ga0065883_101248	Product_name		uncharacterized peroxidase-related enzyme
2606548314	Ga0065883_101248	DNA_length		579bp
2606548314	Ga0065883_101248	Protein_length		192aa
2606548315	Ga0065883_101249	pfam00550	PP-binding		1.5e-14
2606548315	Ga0065883_101249	pfam00550	PP-binding		2.5e-08
2606548315	Ga0065883_101249	Product_name		Phosphopantetheine attachment site
2606548315	Ga0065883_101249	DNA_length		642bp
2606548315	Ga0065883_101249	Protein_length		213aa
2606548316	Ga0065883_101250	COG1396	Transcriptional regulator, contains XRE-family HTH domain		0.0008
2606548316	Ga0065883_101250	pfam13560	HTH_31		1.6e-12
2606548316	Ga0065883_101250	Product_name		Transcriptional regulator, contains XRE-family HTH domain
2606548316	Ga0065883_101250	DNA_length		1236bp
2606548316	Ga0065883_101250	Protein_length		411aa
2606548317	Ga0065883_101251	COG0506	Proline dehydrogenase		5e-12
2606548317	Ga0065883_101251	EC:1.5.-	Oxidoreductases. Acting on the CH-NH group of donors.
2606548317	Ga0065883_101251	Product_name		L-proline dehydrogenase
2606548317	Ga0065883_101251	ITERM:00470		L-proline dehydrogenase (EC 1.5.99.8)
2606548317	Ga0065883_101251	DNA_length		975bp
2606548317	Ga0065883_101251	Protein_length		324aa
2606548317	Ga0065883_101251	KO:K00318	proline dehydrogenase [EC:1.5.-.-]		1.5e-74
2606548318	Ga0065883_101252	COG2091	Phosphopantetheinyl transferase		2e-21
2606548318	Ga0065883_101252	pfam01648	ACPS		3e-09
2606548318	Ga0065883_101252	EC:2.7.8.-	Transferases. Transferring phosphorus-containing groups. Transferases for other substituted phosphate groups.
2606548318	Ga0065883_101252	Product_name		4'-phosphopantetheinyl transferase
2606548318	Ga0065883_101252	DNA_length		771bp
2606548318	Ga0065883_101252	Protein_length		256aa
2606548318	Ga0065883_101252	KO:K06133	4'-phosphopantetheinyl transferase [EC:2.7.8.-]		5.4e-69
2606548319	Ga0065883_101253	Product_name		hypothetical protein
2606548319	Ga0065883_101253	DNA_length		381bp
2606548319	Ga0065883_101253	Protein_length		126aa
2606548320	Ga0065883_101254	COG0192	S-adenosylmethionine synthetase		0
2606548320	Ga0065883_101254	pfam00438	S-AdoMet_synt_N		3.6e-39
2606548320	Ga0065883_101254	pfam02772	S-AdoMet_synt_M		6.5e-44
2606548320	Ga0065883_101254	pfam02773	S-AdoMet_synt_C		4.7e-67
2606548320	Ga0065883_101254	EC:2.5.1.6	Methionine adenosyltransferase.
2606548320	Ga0065883_101254	TIGR01034	S-adenosylmethionine synthetase		0
2606548320	Ga0065883_101254	Product_name		methionine adenosyltransferase
2606548320	Ga0065883_101254	ITERM:01673		methionine adenosyltransferase (EC 2.5.1.6)
2606548320	Ga0065883_101254	DNA_length		1179bp
2606548320	Ga0065883_101254	Protein_length		392aa
2606548320	Ga0065883_101254	KO:K00789	S-adenosylmethionine synthetase [EC:2.5.1.6]		0
2606548321	Ga0065883_101255	Product_name		hypothetical protein
2606548321	Ga0065883_101255	DNA_length		411bp
2606548321	Ga0065883_101255	Protein_length		136aa
2606548322	Ga0065883_101256	TIGR00778	alkylhydroperoxidase AhpD family core domain		4e-11
2606548322	Ga0065883_101256	Product_name		alkylhydroperoxidase AhpD family core domain-containing protein
2606548322	Ga0065883_101256	DNA_length		1047bp
2606548322	Ga0065883_101256	Protein_length		348aa
2606548323	Ga0065883_101257	COG0287	Prephenate dehydrogenase		7e-40
2606548323	Ga0065883_101257	pfam02153	PDH		1e-50
2606548323	Ga0065883_101257	EC:1.3.1.12	Prephenate dehydrogenase.
2606548323	Ga0065883_101257	Product_name		prephenate dehydrogenase
2606548323	Ga0065883_101257	DNA_length		987bp
2606548323	Ga0065883_101257	Protein_length		328aa
2606548323	Ga0065883_101257	KO:K04517	prephenate dehydrogenase [EC:1.3.1.12]		6.1e-91
2606548324	Ga0065883_101258	pfam11716	MDMPI_N		2.8e-27
2606548324	Ga0065883_101258	TIGR03083	uncharacterized Actinobacterial protein TIGR03083		5.7e-46
2606548324	Ga0065883_101258	TIGR03084	TIGR03084 family protein		3.7e-104
2606548324	Ga0065883_101258	Product_name		TIGR03084 family protein
2606548324	Ga0065883_101258	DNA_length		804bp
2606548324	Ga0065883_101258	Protein_length		267aa
2606548325	Ga0065883_101259	COG0824	Acyl-CoA thioesterase FadM		1e-12
2606548325	Ga0065883_101259	Product_name		enediyne biosynthesis thioesterase
2606548325	Ga0065883_101259	DNA_length		471bp
2606548325	Ga0065883_101259	Protein_length		156aa
2606548325	Ga0065883_101259	KO:K15315	enediyne biosynthesis thioesterase		1e-79
2606548326	Ga0065883_101260	COG2303	Choline dehydrogenase or related flavoprotein		5e-33
2606548326	Ga0065883_101260	pfam00732	GMC_oxred_N		6.3e-17
2606548326	Ga0065883_101260	pfam05199	GMC_oxred_C		2.6e-16
2606548326	Ga0065883_101260	Product_name		Choline dehydrogenase
2606548326	Ga0065883_101260	DNA_length		1659bp
2606548326	Ga0065883_101260	Protein_length		552aa
2606548327	Ga0065883_101261	Product_name		hypothetical protein
2606548327	Ga0065883_101261	DNA_length		579bp
2606548327	Ga0065883_101261	Protein_length		192aa
2606548328	Ga0065883_101262	COG1475	Chromosome segregation protein Spo0J, contains ParB-like nuclease domain		0.001
2606548328	Ga0065883_101262	pfam02195	ParBc		5e-05
2606548328	Ga0065883_101262	Product_name		Chromosome segregation protein Spo0J, contains ParB-like nuclease domain
2606548328	Ga0065883_101262	DNA_length		1113bp
2606548328	Ga0065883_101262	Protein_length		370aa
2606548329	Ga0065883_101263	COG2207	AraC-type DNA-binding domain and AraC-containing proteins		1e-21
2606548329	Ga0065883_101263	pfam12833	HTH_18		3.6e-21
2606548329	Ga0065883_101263	Product_name		transcriptional regulator, AraC family
2606548329	Ga0065883_101263	DNA_length		777bp
2606548329	Ga0065883_101263	Protein_length		258aa
2606548330	Ga0065883_101264	COG2124	Cytochrome P450		6e-50
2606548330	Ga0065883_101264	pfam00067	p450		2.3e-77
2606548330	Ga0065883_101264	Product_name		Cytochrome P450
2606548330	Ga0065883_101264	DNA_length		1350bp
2606548330	Ga0065883_101264	Protein_length		449aa
2606548331	Ga0065883_101265	COG1853	NADH-FMN oxidoreductase RutF, flavin reductase (DIM6/NTAB) family		7e-29
2606548331	Ga0065883_101265	pfam01613	Flavin_Reduct		6.6e-34
2606548331	Ga0065883_101265	Product_name		NADH-FMN oxidoreductase RutF, flavin reductase (DIM6/NTAB) family
2606548331	Ga0065883_101265	DNA_length		549bp
2606548331	Ga0065883_101265	Protein_length		182aa
2606548332	Ga0065883_101266	COG0824	Acyl-CoA thioesterase FadM		4e-08
2606548332	Ga0065883_101266	Product_name		enediyne biosynthesis thioesterase
2606548332	Ga0065883_101266	DNA_length		465bp
2606548332	Ga0065883_101266	Protein_length		154aa
2606548332	Ga0065883_101266	KO:K15315	enediyne biosynthesis thioesterase		1.5e-40
2606548333	Ga0065883_101267	pfam08659	KR		1.1e-31
2606548333	Ga0065883_101267	pfam14765	PS-DH		9.2e-39
2606548333	Ga0065883_101267	Product_name		KR domain-containing protein
2606548333	Ga0065883_101267	DNA_length		2910bp
2606548333	Ga0065883_101267	Protein_length		969aa
2606548333	Ga0065883_101267	KO:K15314	enediyne polyketide synthase		0
2606548334	Ga0065883_101268	COG3321	Acyl transferase domain in polyketide synthase (PKS) enzymes		2e-119
2606548334	Ga0065883_101268	pfam00109	ketoacyl-synt		1.2e-55
2606548334	Ga0065883_101268	pfam00698	Acyl_transf_1		6.4e-27
2606548334	Ga0065883_101268	pfam02801	Ketoacyl-synt_C		1e-27
2606548334	Ga0065883_101268	pfam16197	KAsynt_C_assoc		4.9e-13
2606548334	Ga0065883_101268	Product_name		Acyl transferase domain-containing protein
2606548334	Ga0065883_101268	DNA_length		2907bp
2606548334	Ga0065883_101268	Protein_length		968aa
2606548334	Ga0065883_101268	KO:K15314	enediyne polyketide synthase		0
2606548335	Ga0065883_101269	Product_name		hypothetical protein
2606548335	Ga0065883_101269	DNA_length		1113bp
2606548335	Ga0065883_101269	Protein_length		370aa
2606548336	Ga0065883_101270	pfam07593	UnbV_ASPIC		1.4e-09
2606548336	Ga0065883_101270	pfam13517	VCBS		6.8e-09
2606548336	Ga0065883_101270	pfam13517	VCBS		8.7e-07
2606548336	Ga0065883_101270	Product_name		Repeat domain-containing protein
2606548336	Ga0065883_101270	DNA_length		1929bp
2606548336	Ga0065883_101270	Protein_length		642aa
2606548337	Ga0065883_101271	pfam08012	DUF1702		7.8e-130
2606548337	Ga0065883_101271	Product_name		Protein of unknown function (DUF1702)
2606548337	Ga0065883_101271	DNA_length		987bp
2606548337	Ga0065883_101271	Protein_length		328aa
2606548338	Ga0065883_101272	pfam08012	DUF1702		1.3e-130
2606548338	Ga0065883_101272	Product_name		Protein of unknown function (DUF1702)
2606548338	Ga0065883_101272	DNA_length		984bp
2606548338	Ga0065883_101272	Protein_length		327aa
2606548339	Ga0065883_101273	COG1733	DNA-binding transcriptional regulator, HxlR family		3e-25
2606548339	Ga0065883_101273	pfam01638	HxlR		1.7e-21
2606548339	Ga0065883_101273	Product_name		transcriptional regulator, HxlR family
2606548339	Ga0065883_101273	ITERM:02284		transcriptional regulator, HxlR family
2606548339	Ga0065883_101273	DNA_length		444bp
2606548339	Ga0065883_101273	Protein_length		147aa
2606548340	Ga0065883_101274	Product_name		hypothetical protein
2606548340	Ga0065883_101274	DNA_length		564bp
2606548340	Ga0065883_101274	Protein_length		187aa
2606548341	Ga0065883_101275	Product_name		hypothetical protein
2606548341	Ga0065883_101275	DNA_length		471bp
2606548341	Ga0065883_101275	Protein_length		156aa
2606548342	Ga0065883_101276	COG5659	SRSO17 transposase		1e-12
2606548342	Ga0065883_101276	pfam13546	DDE_5		3.1e-54
2606548342	Ga0065883_101276	Product_name		SRSO17 transposase
2606548342	Ga0065883_101276	DNA_length		1242bp
2606548342	Ga0065883_101276	Protein_length		413aa
2606548343	Ga0065883_101277	COG1309	DNA-binding transcriptional regulator, AcrR family		0.0005
2606548343	Ga0065883_101277	pfam00440	TetR_N		3.1e-11
2606548343	Ga0065883_101277	Product_name		transcriptional regulator, TetR family
2606548343	Ga0065883_101277	ITERM:02313		transcriptional regulator, TetR family
2606548343	Ga0065883_101277	DNA_length		606bp
2606548343	Ga0065883_101277	Protein_length		201aa
2606548344	Ga0065883_101278	COG1028	NAD(P)-dependent dehydrogenase, short-chain alcohol dehydrogenase family		1e-38
2606548344	Ga0065883_101278	pfam13561	adh_short_C2		6.7e-60
2606548344	Ga0065883_101278	Product_name		NAD(P)-dependent dehydrogenase, short-chain alcohol dehydrogenase family
2606548344	Ga0065883_101278	DNA_length		765bp
2606548344	Ga0065883_101278	Protein_length		254aa
2606548345	Ga0065883_101279	COG1309	DNA-binding transcriptional regulator, AcrR family		3e-08
2606548345	Ga0065883_101279	pfam00440	TetR_N		4.6e-16
2606548345	Ga0065883_101279	Product_name		transcriptional regulator, TetR family
2606548345	Ga0065883_101279	ITERM:02313		transcriptional regulator, TetR family
2606548345	Ga0065883_101279	DNA_length		675bp
2606548345	Ga0065883_101279	Protein_length		224aa
2606548346	Ga0065883_101280	pfam03756	AfsA		1e-15
2606548346	Ga0065883_101280	pfam03756	AfsA		2.4e-11
2606548346	Ga0065883_101280	Product_name		A-factor biosynthesis hotdog domain-containing protein
2606548346	Ga0065883_101280	DNA_length		918bp
2606548346	Ga0065883_101280	Protein_length		305aa
2606548347	Ga0065883_101281	COG3378	Phage- or plasmid-associated DNA primase		1e-62
2606548347	Ga0065883_101281	pfam03288	Pox_D5		2.6e-05
2606548347	Ga0065883_101281	pfam08706	D5_N		9.3e-27
2606548347	Ga0065883_101281	TIGR01613	phage/plasmid primase, P4 family, C-terminal domain		2.9e-89
2606548347	Ga0065883_101281	Product_name		putative DNA primase/helicase
2606548347	Ga0065883_101281	DNA_length		1665bp
2606548347	Ga0065883_101281	Protein_length		554aa
2606548347	Ga0065883_101281	KO:K06919	putative DNA primase/helicase		0
2606548348	Ga0065883_101282	Product_name		hypothetical protein
2606548348	Ga0065883_101282	DNA_length		402bp
2606548348	Ga0065883_101282	Protein_length		133aa
2606548349	Ga0065883_101283	Product_name		Cytochrome C biogenesis protein transmembrane region
2606548349	Ga0065883_101283	DNA_length		960bp
2606548349	Ga0065883_101283	Protein_length		319aa
2606548350	Ga0065883_101284	COG2128	Alkylhydroperoxidase family enzyme, contains CxxC motif		2e-07
2606548350	Ga0065883_101284	pfam02627	CMD		3.9e-08
2606548350	Ga0065883_101284	TIGR00778	alkylhydroperoxidase AhpD family core domain		1.8e-07
2606548350	Ga0065883_101284	TIGR01926	uncharacterized peroxidase-related enzyme		8.3e-26
2606548350	Ga0065883_101284	Product_name		uncharacterized peroxidase-related enzyme
2606548350	Ga0065883_101284	DNA_length		591bp
2606548350	Ga0065883_101284	Protein_length		196aa
2606548351	Ga0065883_101285	Product_name		hypothetical protein
2606548351	Ga0065883_101285	DNA_length		402bp
2606548351	Ga0065883_101285	Protein_length		133aa
2606548352	Ga0065883_101286	COG3378	Phage- or plasmid-associated DNA primase		9e-65
2606548352	Ga0065883_101286	pfam03288	Pox_D5		4.1e-07
2606548352	Ga0065883_101286	pfam08706	D5_N		2.7e-28
2606548352	Ga0065883_101286	TIGR01613	phage/plasmid primase, P4 family, C-terminal domain		7.3e-91
2606548352	Ga0065883_101286	Product_name		putative DNA primase/helicase
2606548352	Ga0065883_101286	DNA_length		1554bp
2606548352	Ga0065883_101286	Protein_length		517aa
2606548352	Ga0065883_101286	KO:K06919	putative DNA primase/helicase		0
2606548353	Ga0065883_101287	pfam09250	Prim-Pol		8.9e-38
2606548353	Ga0065883_101287	Product_name		Bifunctional DNA primase/polymerase, N-terminal
2606548353	Ga0065883_101287	DNA_length		1113bp
2606548353	Ga0065883_101287	Protein_length		370aa
2606548354	Ga0065883_101288	COG1192	Cellulose biosynthesis protein BcsQ		6e-26
2606548354	Ga0065883_101288	pfam13614	AAA_31		5.1e-17
2606548354	Ga0065883_101288	Product_name		chromosome partitioning protein
2606548354	Ga0065883_101288	DNA_length		1239bp
2606548354	Ga0065883_101288	Protein_length		412aa
2606548354	Ga0065883_101288	KO:K03496	chromosome partitioning protein		0
2606548355	Ga0065883_101289	Product_name		hypothetical protein
2606548355	Ga0065883_101289	DNA_length		234bp
2606548355	Ga0065883_101289	Protein_length		77aa
2606548356	Ga0065883_101290	pfam01381	HTH_3		3.8e-09
2606548356	Ga0065883_101290	Product_name		Helix-turn-helix
2606548356	Ga0065883_101290	DNA_length		2232bp
2606548356	Ga0065883_101290	Protein_length		743aa
2606548357	Ga0065883_101291	Product_name		hypothetical protein
2606548357	Ga0065883_101291	DNA_length		558bp
2606548357	Ga0065883_101291	Protein_length		185aa
2606548358	Ga0065883_101292	COG0346	Catechol 2,3-dioxygenase or other lactoylglutathione lyase family enzyme		1e-05
2606548358	Ga0065883_101292	pfam00903	Glyoxalase		1.4e-10
2606548358	Ga0065883_101292	Product_name		Catechol 2,3-dioxygenase
2606548358	Ga0065883_101292	DNA_length		405bp
2606548358	Ga0065883_101292	Protein_length		134aa
2606548359	Ga0065883_101293	pfam01814	Hemerythrin		1.5e-17
2606548359	Ga0065883_101293	pfam04075	DUF385		8.2e-44
2606548359	Ga0065883_101293	TIGR00026	deazaflavin-dependent oxidoreductase, nitroreductase family		6.4e-38
2606548359	Ga0065883_101293	Product_name		deazaflavin-dependent oxidoreductase, nitroreductase family
2606548359	Ga0065883_101293	DNA_length		927bp
2606548359	Ga0065883_101293	Protein_length		308aa
2606548360	Ga0065883_101294	pfam09250	Prim-Pol		5.8e-36
2606548360	Ga0065883_101294	Product_name		Bifunctional DNA primase/polymerase, N-terminal
2606548360	Ga0065883_101294	DNA_length		1098bp
2606548360	Ga0065883_101294	Protein_length		365aa
2606548361	Ga0065883_101295	COG3378	Phage- or plasmid-associated DNA primase		9e-59
2606548361	Ga0065883_101295	pfam08706	D5_N		7.5e-29
2606548361	Ga0065883_101295	TIGR01613	phage/plasmid primase, P4 family, C-terminal domain		1e-79
2606548361	Ga0065883_101295	Product_name		putative DNA primase/helicase
2606548361	Ga0065883_101295	DNA_length		1539bp
2606548361	Ga0065883_101295	Protein_length		512aa
2606548361	Ga0065883_101295	KO:K06919	putative DNA primase/helicase		0
2606548362	Ga0065883_101296	Product_name		hypothetical protein
2606548362	Ga0065883_101296	DNA_length		387bp
2606548362	Ga0065883_101296	Protein_length		128aa
2606548363	Ga0065883_101297	COG0163	3-polyprenyl-4-hydroxybenzoate decarboxylase		3e-67
2606548363	Ga0065883_101297	pfam02441	Flavoprotein		1e-27
2606548363	Ga0065883_101297	EC:4.1.1.98	4-hydroxy-3-polyprenylbenzoate decarboxylase.
2606548363	Ga0065883_101297	TIGR00421	polyprenyl P-hydroxybenzoate and phenylacrylic acid decarboxylases		5.7e-72
2606548363	Ga0065883_101297	Product_name		4-hydroxy-3-polyprenylbenzoate decarboxylase
2606548363	Ga0065883_101297	DNA_length		621bp
2606548363	Ga0065883_101297	Protein_length		206aa
2606548363	Ga0065883_101297	KO:K03186	4-hydroxy-3-polyprenylbenzoate decarboxylase [EC:4.1.1.98]		2.1e-91
2606548364	Ga0065883_101298	COG0043	3-polyprenyl-4-hydroxybenzoate decarboxylase		4e-85
2606548364	Ga0065883_101298	pfam01977	UbiD		7.1e-105
2606548364	Ga0065883_101298	TIGR00148	UbiD family decarboxylase		9.6e-83
2606548364	Ga0065883_101298	Product_name		UbiD family decarboxylase
2606548364	Ga0065883_101298	DNA_length		1440bp
2606548364	Ga0065883_101298	Protein_length		479aa
2606548365	Ga0065883_101299	COG1522	DNA-binding transcriptional regulator, Lrp family		5e-15
2606548365	Ga0065883_101299	pfam01037	AsnC_trans_reg		3.5e-12
2606548365	Ga0065883_101299	pfam13404	HTH_AsnC-type		6e-09
2606548365	Ga0065883_101299	pfam13404	HTH_AsnC-type		3.3e-07
2606548365	Ga0065883_101299	Product_name		DNA-binding transcriptional regulator, Lrp family
2606548365	Ga0065883_101299	DNA_length		1026bp
2606548365	Ga0065883_101299	Protein_length		341aa
2606548366	Ga0065883_101300	COG0604	NADPH:quinone reductase or related Zn-dependent oxidoreductase		2e-62
2606548366	Ga0065883_101300	pfam08240	ADH_N		5.5e-08
2606548366	Ga0065883_101300	pfam13602	ADH_zinc_N_2		4.2e-28
2606548366	Ga0065883_101300	Product_name		NADPH:quinone reductase
2606548366	Ga0065883_101300	DNA_length		990bp
2606548366	Ga0065883_101300	Protein_length		329aa
2606548367	Ga0065883_101301	COG4977	Transcriptional regulator GlxA family, contains an amidase domain and an AraC-type DNA-binding HTH domain		2e-65
2606548367	Ga0065883_101301	pfam01965	DJ-1_PfpI		2.5e-17
2606548367	Ga0065883_101301	pfam12833	HTH_18		8.8e-19
2606548367	Ga0065883_101301	Product_name		transcriptional regulator, AraC family with amidase-like domain
2606548367	Ga0065883_101301	DNA_length		960bp
2606548367	Ga0065883_101301	Protein_length		319aa
2606548368	Ga0065883_101302	COG5470	Uncharacterized conserved protein, DUF1330 family		1e-16
2606548368	Ga0065883_101302	pfam07045	DUF1330		7.5e-22
2606548368	Ga0065883_101302	Product_name		Uncharacterized conserved protein, DUF1330 family
2606548368	Ga0065883_101302	DNA_length		363bp
2606548368	Ga0065883_101302	Protein_length		120aa
2606548369	Ga0065883_101303	COG0596	Pimeloyl-ACP methyl ester carboxylesterase		4e-14
2606548369	Ga0065883_101303	pfam00561	Abhydrolase_1		1e-19
2606548369	Ga0065883_101303	Product_name		Pimeloyl-ACP methyl ester carboxylesterase
2606548369	Ga0065883_101303	DNA_length		957bp
2606548369	Ga0065883_101303	Protein_length		318aa
2606548370	Ga0065883_101304	COG0304	3-oxoacyl-(acyl-carrier-protein) synthase		7e-92
2606548370	Ga0065883_101304	pfam00109	ketoacyl-synt		1.5e-39
2606548370	Ga0065883_101304	pfam02801	Ketoacyl-synt_C		4.6e-31
2606548370	Ga0065883_101304	EC:2.3.1.179	Beta-ketoacyl-[acyl-carrier-protein] synthase II.
2606548370	Ga0065883_101304	Product_name		3-oxoacyl-[acyl-carrier-protein] synthase II
2606548370	Ga0065883_101304	DNA_length		1245bp
2606548370	Ga0065883_101304	Protein_length		414aa
2606548370	Ga0065883_101304	KO:K09458	3-oxoacyl-[acyl-carrier-protein] synthase II [EC:2.3.1.179]		0
2606548371	Ga0065883_101305	COG0236	Acyl carrier protein		0.0002
2606548371	Ga0065883_101305	pfam00550	PP-binding		2.8e-08
2606548371	Ga0065883_101305	Product_name		acyl carrier protein
2606548371	Ga0065883_101305	DNA_length		234bp
2606548371	Ga0065883_101305	Protein_length		77aa
2606548371	Ga0065883_101305	KO:K02078	acyl carrier protein		2.9e-23
2606548372	Ga0065883_101306	pfam08241	Methyltransf_11		5.5e-16
2606548372	Ga0065883_101306	Product_name		Methyltransferase domain-containing protein
2606548372	Ga0065883_101306	DNA_length		687bp
2606548372	Ga0065883_101306	Protein_length		228aa
2606548373	Ga0065883_101307	Product_name		hypothetical protein
2606548373	Ga0065883_101307	DNA_length		444bp
2606548373	Ga0065883_101307	Protein_length		147aa
2606548374	Ga0065883_101308	Product_name		hypothetical protein
2606548374	Ga0065883_101308	DNA_length		702bp
2606548374	Ga0065883_101308	Protein_length		233aa
2606548375	Ga0065883_1021	COG0637	Beta-phosphoglucomutase or related phosphatase, HAD superfamily		4e-37
2606548375	Ga0065883_1021	pfam13419	HAD_2		4.5e-26
2606548375	Ga0065883_1021	TIGR01509	haloacid dehalogenase superfamily, subfamily IA, variant 3 with third motif having DD or ED		6.3e-20
2606548375	Ga0065883_1021	Product_name		haloacid dehalogenase superfamily, subfamily IA, variant 3 with third motif having DD or ED
2606548375	Ga0065883_1021	DNA_length		645bp
2606548375	Ga0065883_1021	Protein_length		214aa
2606548376	Ga0065883_1022	COG2814	Predicted arabinose efflux permease, MFS family		3e-05
2606548376	Ga0065883_1022	pfam07690	MFS_1		1.7e-10
2606548376	Ga0065883_1022	Product_name		Predicted arabinose efflux permease, MFS family
2606548376	Ga0065883_1022	DNA_length		1206bp
2606548376	Ga0065883_1022	Protein_length		401aa
2606548377	Ga0065883_1023	COG0123	Acetoin utilization deacetylase AcuC or a related deacetylase		6e-73
2606548377	Ga0065883_1023	pfam00850	Hist_deacetyl		3.5e-66
2606548377	Ga0065883_1023	Product_name		acetoin utilization protein AcuC
2606548377	Ga0065883_1023	DNA_length		1173bp
2606548377	Ga0065883_1023	Protein_length		390aa
2606548377	Ga0065883_1023	KO:K04768	acetoin utilization protein AcuC		0
2606548378	Ga0065883_1024	pfam15698	Phosphatase		2.2e-116
2606548378	Ga0065883_1024	Product_name		Phosphatase
2606548378	Ga0065883_1024	DNA_length		816bp
2606548378	Ga0065883_1024	Protein_length		271aa
2606548379	Ga0065883_1025	pfam12728	HTH_17		8.2e-14
2606548379	Ga0065883_1025	TIGR01764	DNA binding domain, excisionase family		1.3e-24
2606548379	Ga0065883_1025	Product_name		DNA binding domain-containing protein, excisionase family
2606548379	Ga0065883_1025	DNA_length		246bp
2606548379	Ga0065883_1025	Protein_length		81aa
2606548380	Ga0065883_1026	COG0451	Nucleoside-diphosphate-sugar epimerase		1e-25
2606548380	Ga0065883_1026	pfam01370	Epimerase		1.6e-22
2606548380	Ga0065883_1026	EC:5.1.3.2	UDP-glucose 4-epimerase.
2606548380	Ga0065883_1026	Product_name		UDP-glucose 4-epimerase
2606548380	Ga0065883_1026	DNA_length		1122bp
2606548380	Ga0065883_1026	Protein_length		373aa
2606548380	Ga0065883_1026	KO:K01784	UDP-glucose 4-epimerase [EC:5.1.3.2]		0
2606548381	Ga0065883_1027	COG0204	1-acyl-sn-glycerol-3-phosphate acyltransferase		2e-22
2606548381	Ga0065883_1027	pfam01553	Acyltransferase		6.4e-17
2606548381	Ga0065883_1027	Product_name		1-acyl-sn-glycerol-3-phosphate acyltransferase
2606548381	Ga0065883_1027	DNA_length		1056bp
2606548381	Ga0065883_1027	Protein_length		351aa
2606548382	Ga0065883_1028	Product_name		hypothetical protein
2606548382	Ga0065883_1028	DNA_length		1194bp
2606548382	Ga0065883_1028	Protein_length		397aa
2606548383	Ga0065883_1029	COG1595	DNA-directed RNA polymerase specialized sigma subunit, sigma24 family		2e-26
2606548383	Ga0065883_1029	pfam04542	Sigma70_r2		7.6e-18
2606548383	Ga0065883_1029	pfam08281	Sigma70_r4_2		1.2e-13
2606548383	Ga0065883_1029	TIGR02937	RNA polymerase sigma factor, sigma-70 family		4.4e-33
2606548383	Ga0065883_1029	TIGR02952	RNA polymerase sigma-70 factor, TIGR02952 family		2.2e-82
2606548383	Ga0065883_1029	Product_name		RNA polymerase sigma-70 factor, ECF subfamily
2606548383	Ga0065883_1029	DNA_length		777bp
2606548383	Ga0065883_1029	Protein_length		258aa
2606548383	Ga0065883_1029	KO:K03088	RNA polymerase sigma-70 factor, ECF subfamily		0
2606548384	Ga0065883_10210	COG0560	Phosphoserine phosphatase		2e-33
2606548384	Ga0065883_10210	pfam12710	HAD		5.5e-28
2606548384	Ga0065883_10210	TIGR01488	Haloacid Dehalogenase superfamily, subfamily IB, phosphoserine phosphatase-like		8.2e-20
2606548384	Ga0065883_10210	TIGR01490	HAD-superfamily subfamily IB hydrolase, TIGR01490		3.8e-58
2606548384	Ga0065883_10210	Product_name		HAD-superfamily subfamily IB hydrolase, TIGR01490
2606548384	Ga0065883_10210	DNA_length		915bp
2606548384	Ga0065883_10210	Protein_length		304aa
2606548385	Ga0065883_10211	COG0695	Glutaredoxin		0.008
2606548385	Ga0065883_10211	pfam05768	DUF836		1e-16
2606548385	Ga0065883_10211	Product_name		Glutaredoxin
2606548385	Ga0065883_10211	DNA_length		276bp
2606548385	Ga0065883_10211	Protein_length		91aa
2606548386	Ga0065883_10212	COG2344	NADH/NAD ratio-sensing transcriptional regulator Rex		2e-59
2606548386	Ga0065883_10212	pfam02629	CoA_binding		1.5e-20
2606548386	Ga0065883_10212	pfam06971	Put_DNA-bind_N		4.2e-19
2606548386	Ga0065883_10212	Product_name		redox-sensing transcriptional repressor
2606548386	Ga0065883_10212	DNA_length		771bp
2606548386	Ga0065883_10212	Protein_length		256aa
2606548386	Ga0065883_10212	KO:K01926	redox-sensing transcriptional repressor		0
2606548387	Ga0065883_10213	COG0373	Glutamyl-tRNA reductase		4e-84
2606548387	Ga0065883_10213	pfam00745	GlutR_dimer		1.3e-20
2606548387	Ga0065883_10213	pfam01488	Shikimate_DH		1.8e-16
2606548387	Ga0065883_10213	pfam05201	GlutR_N		5.5e-44
2606548387	Ga0065883_10213	EC:1.2.1.70	Glutamyl-tRNA reductase.
2606548387	Ga0065883_10213	TIGR01035	glutamyl-tRNA reductase		1.5e-81
2606548387	Ga0065883_10213	Product_name		glutamyl-tRNA reductase
2606548387	Ga0065883_10213	ITERM:00113		glutamyl-tRNA reductase (EC 1.2.1.70)
2606548387	Ga0065883_10213	DNA_length		1494bp
2606548387	Ga0065883_10213	Protein_length		497aa
2606548387	Ga0065883_10213	KO:K02492	glutamyl-tRNA reductase [EC:1.2.1.70]		0
2606548388	Ga0065883_10214	COG0181	Porphobilinogen deaminase		1e-86
2606548388	Ga0065883_10214	pfam01379	Porphobil_deam		2.1e-67
2606548388	Ga0065883_10214	pfam03900	Porphobil_deamC		7.1e-18
2606548388	Ga0065883_10214	EC:2.5.1.61	Hydroxymethylbilane synthase.
2606548388	Ga0065883_10214	TIGR00212	hydroxymethylbilane synthase		1.2e-90
2606548388	Ga0065883_10214	Product_name		hydroxymethylbilane synthase
2606548388	Ga0065883_10214	ITERM:00116		hydroxymethylbilane synthase (EC 2.5.1.61)
2606548388	Ga0065883_10214	DNA_length		987bp
2606548388	Ga0065883_10214	Protein_length		328aa
2606548388	Ga0065883_10214	KO:K01749	hydroxymethylbilane synthase [EC:2.5.1.61]		0
2606548389	Ga0065883_10215	COG1587	Uroporphyrinogen-III synthase		7e-43
2606548389	Ga0065883_10215	pfam00590	TP_methylase		4.2e-32
2606548389	Ga0065883_10215	pfam02602	HEM4		1.3e-62
2606548389	Ga0065883_10215	EC:2.1.1.107	Uroporphyrinogen-III C-methyltransferase.
2606548389	Ga0065883_10215	EC:4.2.1.75	Uroporphyrinogen-III synthase.
2606548389	Ga0065883_10215	Product_name		uroporphyrinogen III methyltransferase / synthase
2606548389	Ga0065883_10215	DNA_length		1671bp
2606548389	Ga0065883_10215	Protein_length		556aa
2606548389	Ga0065883_10215	KO:K13542	uroporphyrinogen III methyltransferase / synthase [EC:2.1.1.107 4.2.1.75]		0
2606548390	Ga0065883_10216	COG0113	Delta-aminolevulinic acid dehydratase, porphobilinogen synthase		0
2606548390	Ga0065883_10216	pfam00490	ALAD		0
2606548390	Ga0065883_10216	EC:4.2.1.24	Porphobilinogen synthase.
2606548390	Ga0065883_10216	Product_name		porphobilinogen synthase
2606548390	Ga0065883_10216	DNA_length		999bp
2606548390	Ga0065883_10216	Protein_length		332aa
2606548390	Ga0065883_10216	KO:K01698	porphobilinogen synthase [EC:4.2.1.24]		0
2606548391	Ga0065883_10217	COG0744	Membrane carboxypeptidase (penicillin-binding protein)		9e-95
2606548391	Ga0065883_10217	pfam00905	Transpeptidase		3.2e-16
2606548391	Ga0065883_10217	pfam00912	Transgly		8e-54
2606548391	Ga0065883_10217	Product_name		Membrane carboxypeptidase (penicillin-binding protein)
2606548391	Ga0065883_10217	DNA_length		1962bp
2606548391	Ga0065883_10217	Protein_length		653aa
2606548392	Ga0065883_10218	Product_name		HEAT repeats
2606548392	Ga0065883_10218	DNA_length		438bp
2606548392	Ga0065883_10218	Protein_length		145aa
2606548393	Ga0065883_10219	pfam14062	DUF4253		1.1e-39
2606548393	Ga0065883_10219	Product_name		protein of unknown function (DUF4253)
2606548393	Ga0065883_10219	DNA_length		786bp
2606548393	Ga0065883_10219	Protein_length		261aa
2606548394	Ga0065883_10220	COG0262	Dihydrofolate reductase		8e-17
2606548394	Ga0065883_10220	pfam01872	RibD_C		8.2e-26
2606548394	Ga0065883_10220	Product_name		Dihydrofolate reductase
2606548394	Ga0065883_10220	DNA_length		567bp
2606548394	Ga0065883_10220	Protein_length		188aa
2606548395	Ga0065883_10221	pfam04149	DUF397		9.8e-22
2606548395	Ga0065883_10221	pfam04149	DUF397		1.4e-06
2606548395	Ga0065883_10221	pfam04149	DUF397		3.2e-05
2606548395	Ga0065883_10221	Product_name		protein of unknown function (DUF397)
2606548395	Ga0065883_10221	DNA_length		303bp
2606548395	Ga0065883_10221	Protein_length		100aa
2606548396	Ga0065883_10222	pfam13560	HTH_31		1.6e-06
2606548396	Ga0065883_10222	Product_name		Helix-turn-helix domain-containing protein
2606548396	Ga0065883_10222	DNA_length		825bp
2606548396	Ga0065883_10222	Protein_length		274aa
2606548397	Ga0065883_10223	pfam04149	DUF397		5.3e-22
2606548397	Ga0065883_10223	pfam04149	DUF397		9.3e-07
2606548397	Ga0065883_10223	Product_name		protein of unknown function (DUF397)
2606548397	Ga0065883_10223	DNA_length		243bp
2606548397	Ga0065883_10223	Protein_length		80aa
2606548398	Ga0065883_10224	Product_name		hypothetical protein
2606548398	Ga0065883_10224	DNA_length		792bp
2606548398	Ga0065883_10224	Protein_length		263aa
2606548399	Ga0065883_10225	Product_name		hypothetical protein
2606548399	Ga0065883_10225	DNA_length		501bp
2606548399	Ga0065883_10225	Protein_length		166aa
2606548400	Ga0065883_10226	pfam14016	DUF4232		2.9e-23
2606548400	Ga0065883_10226	Product_name		Protein of unknown function (DUF4232)
2606548400	Ga0065883_10226	DNA_length		723bp
2606548400	Ga0065883_10226	Protein_length		240aa
2606548401	Ga0065883_10227	pfam13560	HTH_31		4.6e-12
2606548401	Ga0065883_10227	Product_name		Helix-turn-helix domain-containing protein
2606548401	Ga0065883_10227	DNA_length		1479bp
2606548401	Ga0065883_10227	Protein_length		492aa
2606548402	Ga0065883_10228	COG0018	Arginyl-tRNA synthetase		1e-129
2606548402	Ga0065883_10228	pfam00750	tRNA-synt_1d		4.6e-98
2606548402	Ga0065883_10228	pfam03485	Arg_tRNA_synt_N		2.3e-17
2606548402	Ga0065883_10228	pfam05746	DALR_1		1.9e-30
2606548402	Ga0065883_10228	EC:6.1.1.19	Arginine--tRNA ligase.
2606548402	Ga0065883_10228	TIGR00456	arginyl-tRNA synthetase		0
2606548402	Ga0065883_10228	Product_name		arginyl-tRNA synthetase
2606548402	Ga0065883_10228	ITERM:00390		arginyl-tRNA synthetase (EC 6.1.1.19)
2606548402	Ga0065883_10228	DNA_length		1836bp
2606548402	Ga0065883_10228	Protein_length		611aa
2606548402	Ga0065883_10228	KO:K01887	arginyl-tRNA synthetase [EC:6.1.1.19]		0
2606548403	Ga0065883_10229	COG1384	Lysyl-tRNA synthetase, class I		1e-96
2606548403	Ga0065883_10229	pfam01921	tRNA-synt_1f		6.9e-125
2606548403	Ga0065883_10229	EC:6.1.1.6	Lysine--tRNA ligase.
2606548403	Ga0065883_10229	TIGR00467	lysyl-tRNA synthetase, archaeal and spirochete		1.1e-56
2606548403	Ga0065883_10229	Product_name		lysyl-tRNA synthetase, class I
2606548403	Ga0065883_10229	ITERM:00395		lysyl-tRNA synthetase, class I (EC 6.1.1.6)
2606548403	Ga0065883_10229	DNA_length		1767bp
2606548403	Ga0065883_10229	Protein_length		588aa
2606548403	Ga0065883_10229	KO:K04566	lysyl-tRNA synthetase, class I [EC:6.1.1.6]		0
2606548404	Ga0065883_10230	pfam10935	DUF2637		4.8e-40
2606548404	Ga0065883_10230	Product_name		Protein of unknown function (DUF2637)
2606548404	Ga0065883_10230	DNA_length		1458bp
2606548404	Ga0065883_10230	Protein_length		485aa
2606548405	Ga0065883_10231	pfam12079	DUF3558		2.7e-07
2606548405	Ga0065883_10231	Product_name		Protein of unknown function (DUF3558)
2606548405	Ga0065883_10231	DNA_length		855bp
2606548405	Ga0065883_10231	Protein_length		284aa
2606548406	Ga0065883_10232	Product_name		hypothetical protein
2606548406	Ga0065883_10232	DNA_length		816bp
2606548406	Ga0065883_10232	Protein_length		271aa
2606548407	Ga0065883_10233	COG1690	RNA-splicing ligase RtcB, repairs tRNA damage		3e-99
2606548407	Ga0065883_10233	pfam01139	RtcB		4.9e-129
2606548407	Ga0065883_10233	EC:6.5.1.3	RNA ligase (ATP).
2606548407	Ga0065883_10233	Product_name		tRNA-splicing ligase RtcB
2606548407	Ga0065883_10233	DNA_length		1194bp
2606548407	Ga0065883_10233	Protein_length		397aa
2606548407	Ga0065883_10233	KO:K14415	tRNA-splicing ligase RtcB [EC:6.5.1.3]		0
2606548408	Ga0065883_10234	COG4221	NADP-dependent 3-hydroxy acid dehydrogenase YdfG		1e-62
2606548408	Ga0065883_10234	pfam00106	adh_short		5e-48
2606548408	Ga0065883_10234	Product_name		NADP-dependent 3-hydroxy acid dehydrogenase YdfG
2606548408	Ga0065883_10234	DNA_length		759bp
2606548408	Ga0065883_10234	Protein_length		252aa
2606548409	Ga0065883_10235	COG1742	Uncharacterized inner membrane protein YnfA, drug/metabolite transporter superfamily		3e-25
2606548409	Ga0065883_10235	pfam02694	UPF0060		1.9e-41
2606548409	Ga0065883_10235	Product_name		small multidrug resistance family-3 protein
2606548409	Ga0065883_10235	DNA_length		336bp
2606548409	Ga0065883_10235	Protein_length		111aa
2606548409	Ga0065883_10235	KO:K09771	small multidrug resistance family-3 protein		1.3e-76
2606548410	Ga0065883_10236	Product_name		hypothetical protein
2606548410	Ga0065883_10236	DNA_length		192bp
2606548410	Ga0065883_10236	Protein_length		63aa
2606548411	Ga0065883_10237	COG1656	Uncharacterized conserved protein, contains PIN domain		3e-28
2606548411	Ga0065883_10237	pfam01927	Mut7-C		6.1e-41
2606548411	Ga0065883_10237	pfam14451	Ub-Mut7C		8.4e-25
2606548411	Ga0065883_10237	Product_name		hypothetical protein
2606548411	Ga0065883_10237	DNA_length		735bp
2606548411	Ga0065883_10237	Protein_length		244aa
2606548411	Ga0065883_10237	KO:K09122	uncharacterized protein		0
2606548412	Ga0065883_10238	COG1960	Acyl-CoA dehydrogenase related to the alkylation response protein AidB		9e-15
2606548412	Ga0065883_10238	Product_name		Acyl-CoA dehydrogenase
2606548412	Ga0065883_10238	DNA_length		1113bp
2606548412	Ga0065883_10238	Protein_length		370aa
2606548413	Ga0065883_10239	pfam13411	MerR_1		6.1e-08
2606548413	Ga0065883_10239	Product_name		MerR HTH family regulatory protein
2606548413	Ga0065883_10239	DNA_length		381bp
2606548413	Ga0065883_10239	Protein_length		126aa
2606548414	Ga0065883_10240	Product_name		hypothetical protein
2606548414	Ga0065883_10240	DNA_length		405bp
2606548414	Ga0065883_10240	Protein_length		134aa
2606548415	Ga0065883_10241	Product_name		hypothetical protein
2606548415	Ga0065883_10241	DNA_length		438bp
2606548415	Ga0065883_10241	Protein_length		145aa
2606548416	Ga0065883_10242	COG0001	Glutamate-1-semialdehyde aminotransferase		0
2606548416	Ga0065883_10242	pfam00202	Aminotran_3		2.4e-76
2606548416	Ga0065883_10242	EC:5.4.3.8	Glutamate-1-semialdehyde 2,1-aminomutase.
2606548416	Ga0065883_10242	TIGR00713	glutamate-1-semialdehyde-2,1-aminomutase		0
2606548416	Ga0065883_10242	Product_name		glutamate-1-semialdehyde 2,1-aminomutase
2606548416	Ga0065883_10242	DNA_length		1308bp
2606548416	Ga0065883_10242	Protein_length		435aa
2606548416	Ga0065883_10242	KO:K01845	glutamate-1-semialdehyde 2,1-aminomutase [EC:5.4.3.8]		0
2606548417	Ga0065883_10243	COG0406	Broad specificity phosphatase PhoE		5e-23
2606548417	Ga0065883_10243	pfam00300	His_Phos_1		1.5e-35
2606548417	Ga0065883_10243	Product_name		Broad specificity phosphatase PhoE
2606548417	Ga0065883_10243	DNA_length		726bp
2606548417	Ga0065883_10243	Protein_length		241aa
2606548418	Ga0065883_10244	Product_name		hypothetical protein
2606548418	Ga0065883_10244	DNA_length		1254bp
2606548418	Ga0065883_10244	Protein_length		417aa
2606548419	Ga0065883_10245	COG0526	Thiol-disulfide isomerase or thioredoxin		4e-13
2606548419	Ga0065883_10245	pfam00578	AhpC-TSA		1.3e-23
2606548419	Ga0065883_10245	Product_name		Thiol-disulfide isomerase or thioredoxin
2606548419	Ga0065883_10245	DNA_length		603bp
2606548419	Ga0065883_10245	Protein_length		200aa
2606548420	Ga0065883_10246	COG0785	Cytochrome c biogenesis protein CcdA		3e-26
2606548420	Ga0065883_10246	pfam02683	DsbD		2e-52
2606548420	Ga0065883_10246	Product_name		cytochrome c-type biogenesis protein
2606548420	Ga0065883_10246	DNA_length		756bp
2606548420	Ga0065883_10246	Protein_length		251aa
2606548420	Ga0065883_10246	KO:K06196	cytochrome c-type biogenesis protein		0
2606548421	Ga0065883_10247	COG1333	Cytochrome c biogenesis protein ResB		8e-65
2606548421	Ga0065883_10247	pfam05140	ResB		5.2e-128
2606548421	Ga0065883_10247	Product_name		cytochrome c biogenesis protein
2606548421	Ga0065883_10247	DNA_length		1848bp
2606548421	Ga0065883_10247	Protein_length		615aa
2606548421	Ga0065883_10247	KO:K07399	cytochrome c biogenesis protein		0
2606548422	Ga0065883_10248	COG0755	ABC-type transport system involved in cytochrome c biogenesis, permease component		2e-25
2606548422	Ga0065883_10248	pfam01578	Cytochrom_C_asm		7.3e-44
2606548422	Ga0065883_10248	TIGR03144	cytochrome c-type biogenesis protein CcsB		1.2e-80
2606548422	Ga0065883_10248	Product_name		cytochrome c-type biogenesis protein CcsB
2606548422	Ga0065883_10248	DNA_length		1089bp
2606548422	Ga0065883_10248	Protein_length		362aa
2606548423	Ga0065883_10249	COG0590	tRNA(Arg) A34 adenosine deaminase TadA		2e-23
2606548423	Ga0065883_10249	pfam00383	dCMP_cyt_deam_1		4.5e-17
2606548423	Ga0065883_10249	EC:3.5.4.1	Cytosine deaminase.
2606548423	Ga0065883_10249	Product_name		cytosine deaminase
2606548423	Ga0065883_10249	DNA_length		450bp
2606548423	Ga0065883_10249	Protein_length		149aa
2606548423	Ga0065883_10249	KO:K01485	cytosine deaminase [EC:3.5.4.1]		1.7e-88
2606548424	Ga0065883_10250	COG1012	Acyl-CoA reductase or other NAD-dependent aldehyde dehydrogenase		2e-86
2606548424	Ga0065883_10250	pfam00171	Aldedh		3.9e-87
2606548424	Ga0065883_10250	EC:1.2.1.3	Aldehyde dehydrogenase (NAD(+)).
2606548424	Ga0065883_10250	Product_name		aldehyde dehydrogenase (NAD+)
2606548424	Ga0065883_10250	DNA_length		1347bp
2606548424	Ga0065883_10250	Protein_length		448aa
2606548424	Ga0065883_10250	KO:K00128	aldehyde dehydrogenase (NAD+) [EC:1.2.1.3]		0
2606548425	Ga0065883_10251	COG1846	DNA-binding transcriptional regulator, MarR family		1e-10
2606548425	Ga0065883_10251	pfam12802	MarR_2		1.2e-11
2606548425	Ga0065883_10251	Product_name		DNA-binding transcriptional regulator, MarR family
2606548425	Ga0065883_10251	DNA_length		441bp
2606548425	Ga0065883_10251	Protein_length		146aa
2606548426	Ga0065883_10252	pfam13396	PLDc_N		3.1e-12
2606548426	Ga0065883_10252	Product_name		Phospholipase_D-nuclease N-terminal
2606548426	Ga0065883_10252	DNA_length		408bp
2606548426	Ga0065883_10252	Protein_length		135aa
2606548427	Ga0065883_10253	COG0043	3-polyprenyl-4-hydroxybenzoate decarboxylase		0
2606548427	Ga0065883_10253	pfam01977	UbiD		0
2606548427	Ga0065883_10253	EC:4.1.1.98	4-hydroxy-3-polyprenylbenzoate decarboxylase.
2606548427	Ga0065883_10253	TIGR03701	menaquinone biosynthesis decarboxylase, SCO4490 family		0
2606548427	Ga0065883_10253	TIGR00148	UbiD family decarboxylase		0
2606548427	Ga0065883_10253	Product_name		3-octaprenyl-4hydroxybenzoate decarboxylase
2606548427	Ga0065883_10253	ITERM:00554		3-octaprenyl-4hydroxybenzoate decarboxylase (EC 4.1.1.-)
2606548427	Ga0065883_10253	DNA_length		1566bp
2606548427	Ga0065883_10253	Protein_length		521aa
2606548427	Ga0065883_10253	KO:K03182	4-hydroxy-3-polyprenylbenzoate decarboxylase [EC:4.1.1.98]		0
2606548428	Ga0065883_10254	COG0382	4-hydroxybenzoate polyprenyltransferase		3e-38
2606548428	Ga0065883_10254	pfam01040	UbiA		3.5e-51
2606548428	Ga0065883_10254	EC:2.5.1.39	4-hydroxybenzoate polyprenyltransferase.
2606548428	Ga0065883_10254	TIGR01475	putative 4-hydroxybenzoate polyprenyltransferase		2.2e-92
2606548428	Ga0065883_10254	Product_name		4-hydroxybenzoate polyprenyltransferase
2606548428	Ga0065883_10254	ITERM:00553		4-hydroxybenzoate polyprenyltransferase (EC 2.5.1.39)
2606548428	Ga0065883_10254	DNA_length		918bp
2606548428	Ga0065883_10254	Protein_length		305aa
2606548428	Ga0065883_10254	KO:K03179	4-hydroxybenzoate polyprenyltransferase [EC:2.5.1.39]		0
2606548429	Ga0065883_10255	pfam01694	Rhomboid		1.3e-27
2606548429	Ga0065883_10255	Product_name		Rhomboid family protein
2606548429	Ga0065883_10255	DNA_length		624bp
2606548429	Ga0065883_10255	Protein_length		207aa
2606548430	Ga0065883_10256	COG0163	3-polyprenyl-4-hydroxybenzoate decarboxylase		7e-47
2606548430	Ga0065883_10256	pfam02441	Flavoprotein		2.5e-20
2606548430	Ga0065883_10256	EC:4.1.1.98	4-hydroxy-3-polyprenylbenzoate decarboxylase.
2606548430	Ga0065883_10256	TIGR00421	polyprenyl P-hydroxybenzoate and phenylacrylic acid decarboxylases		8.5e-39
2606548430	Ga0065883_10256	Product_name		4-hydroxy-3-polyprenylbenzoate decarboxylase
2606548430	Ga0065883_10256	DNA_length		648bp
2606548430	Ga0065883_10256	Protein_length		215aa
2606548430	Ga0065883_10256	KO:K03186	4-hydroxy-3-polyprenylbenzoate decarboxylase [EC:4.1.1.98]		0
2606548431	Ga0065883_10257	Product_name		hypothetical protein
2606548431	Ga0065883_10257	DNA_length		135bp
2606548431	Ga0065883_10257	Protein_length		44aa
2606548432	Ga0065883_10258	COG1522	DNA-binding transcriptional regulator, Lrp family		2e-24
2606548432	Ga0065883_10258	pfam01037	AsnC_trans_reg		3.5e-18
2606548432	Ga0065883_10258	pfam13404	HTH_AsnC-type		9.3e-17
2606548432	Ga0065883_10258	Product_name		transcriptional regulator, AsnC family
2606548432	Ga0065883_10258	ITERM:01884		transcriptional regulator, AsnC family
2606548432	Ga0065883_10258	DNA_length		456bp
2606548432	Ga0065883_10258	Protein_length		151aa
2606548432	Ga0065883_10258	KO:K03719	Lrp/AsnC family transcriptional regulator, leucine-responsive regulatory protein		1.2e-104
2606548433	Ga0065883_10259	COG1060	2-iminoacetate synthase ThiH (tyrosine cleavage enzyme, thamine biosynthesis)		6e-90
2606548433	Ga0065883_10259	pfam04055	Radical_SAM		1.2e-11
2606548433	Ga0065883_10259	EC:2.5.1.120	Aminodeoxyfutalosine synthase.
2606548433	Ga0065883_10259	TIGR00423	radical SAM domain protein, CofH subfamily		1.1e-94
2606548433	Ga0065883_10259	TIGR03700	putative menaquinone biosynthesis radical SAM enzyme, SCO4494 family		0
2606548433	Ga0065883_10259	Product_name		aminodeoxyfutalosine synthase
2606548433	Ga0065883_10259	DNA_length		1164bp
2606548433	Ga0065883_10259	Protein_length		387aa
2606548433	Ga0065883_10259	KO:K18285	aminodeoxyfutalosine synthase [EC:2.5.1.120]		0
2606548434	Ga0065883_10260	pfam00583	Acetyltransf_1		2.8e-12
2606548434	Ga0065883_10260	Product_name		Acetyltransferase (GNAT) family protein
2606548434	Ga0065883_10260	DNA_length		558bp
2606548434	Ga0065883_10260	Protein_length		185aa
2606548435	Ga0065883_10261	pfam14012	DUF4229		1e-19
2606548435	Ga0065883_10261	Product_name		Protein of unknown function (DUF4229)
2606548435	Ga0065883_10261	DNA_length		294bp
2606548435	Ga0065883_10261	Protein_length		97aa
2606548436	Ga0065883_10262	COG1301	Na+/H+-dicarboxylate symporter		3e-86
2606548436	Ga0065883_10262	pfam00375	SDF		1.9e-112
2606548436	Ga0065883_10262	Product_name		Na+/H+-dicarboxylate symporter
2606548436	Ga0065883_10262	DNA_length		1365bp
2606548436	Ga0065883_10262	Protein_length		454aa
2606548437	Ga0065883_10263	pfam03403	PAF-AH_p_II		1.8e-07
2606548437	Ga0065883_10263	Product_name		Alpha/beta hydrolase family protein
2606548437	Ga0065883_10263	DNA_length		1272bp
2606548437	Ga0065883_10263	Protein_length		423aa
2606548438	Ga0065883_10264	COG1309	DNA-binding transcriptional regulator, AcrR family		2e-11
2606548438	Ga0065883_10264	pfam00440	TetR_N		8.5e-16
2606548438	Ga0065883_10264	Product_name		transcriptional regulator, TetR family
2606548438	Ga0065883_10264	ITERM:02313		transcriptional regulator, TetR family
2606548438	Ga0065883_10264	DNA_length		642bp
2606548438	Ga0065883_10264	Protein_length		213aa
2606548439	Ga0065883_10265	pfam01575	MaoC_dehydratas		7.3e-13
2606548439	Ga0065883_10265	Product_name		MaoC like domain-containing protein
2606548439	Ga0065883_10265	DNA_length		906bp
2606548439	Ga0065883_10265	Protein_length		301aa
2606548440	Ga0065883_10266	COG1028	NAD(P)-dependent dehydrogenase, short-chain alcohol dehydrogenase family		1e-32
2606548440	Ga0065883_10266	pfam13561	adh_short_C2		7.1e-49
2606548440	Ga0065883_10266	EC:1.1.1.100	3-oxoacyl-[acyl-carrier-protein] reductase.
2606548440	Ga0065883_10266	Product_name		3-oxoacyl-[acyl-carrier protein] reductase
2606548440	Ga0065883_10266	DNA_length		1320bp
2606548440	Ga0065883_10266	Protein_length		439aa
2606548440	Ga0065883_10266	KO:K00059	3-oxoacyl-[acyl-carrier protein] reductase [EC:1.1.1.100]		0
2606548441	Ga0065883_10267	COG0183	Acetyl-CoA acetyltransferase		1e-58
2606548441	Ga0065883_10267	pfam00108	Thiolase_N		4.1e-46
2606548441	Ga0065883_10267	pfam02803	Thiolase_C		9.6e-34
2606548441	Ga0065883_10267	EC:2.3.1.9	Acetyl-CoA C-acetyltransferase.
2606548441	Ga0065883_10267	TIGR01930	acetyl-CoA acetyltransferases		5.6e-121
2606548441	Ga0065883_10267	Product_name		acetyl-CoA C-acetyltransferase
2606548441	Ga0065883_10267	DNA_length		1278bp
2606548441	Ga0065883_10267	Protein_length		425aa
2606548441	Ga0065883_10267	KO:K00626	acetyl-CoA C-acetyltransferase [EC:2.3.1.9]		0
2606548442	Ga0065883_10268	COG1022	Long-chain acyl-CoA synthetase (AMP-forming)		0
2606548442	Ga0065883_10268	pfam00501	AMP-binding		6.1e-87
2606548442	Ga0065883_10268	EC:6.2.1.3	Long-chain-fatty-acid--CoA ligase.
2606548442	Ga0065883_10268	Product_name		long-chain acyl-CoA synthetase
2606548442	Ga0065883_10268	DNA_length		1905bp
2606548442	Ga0065883_10268	Protein_length		634aa
2606548442	Ga0065883_10268	KO:K01897	long-chain acyl-CoA synthetase [EC:6.2.1.3]		0
2606548443	Ga0065883_10269	COG2518	Protein-L-isoaspartate O-methyltransferase		1e-29
2606548443	Ga0065883_10269	pfam01135	PCMT		4.7e-24
2606548443	Ga0065883_10269	Product_name		Protein-L-isoaspartate O-methyltransferase
2606548443	Ga0065883_10269	DNA_length		1098bp
2606548443	Ga0065883_10269	Protein_length		365aa
2606548444	Ga0065883_10270	Product_name		hypothetical protein
2606548444	Ga0065883_10270	DNA_length		276bp
2606548444	Ga0065883_10270	Protein_length		91aa
2606548445	Ga0065883_10271	pfam01381	HTH_3		1.2e-05
2606548445	Ga0065883_10271	Product_name		Helix-turn-helix
2606548445	Ga0065883_10271	DNA_length		1326bp
2606548445	Ga0065883_10271	Protein_length		441aa
2606548446	Ga0065883_10272	pfam01551	Peptidase_M23		1.7e-20
2606548446	Ga0065883_10272	Product_name		Peptidase family M23
2606548446	Ga0065883_10272	DNA_length		834bp
2606548446	Ga0065883_10272	Protein_length		277aa
2606548447	Ga0065883_10273	pfam13527	Acetyltransf_9		1.8e-17
2606548447	Ga0065883_10273	Product_name		Acetyltransferase (GNAT) domain-containing protein
2606548447	Ga0065883_10273	DNA_length		1236bp
2606548447	Ga0065883_10273	Protein_length		411aa
2606548448	Ga0065883_10274	pfam03752	ALF		2.5e-12
2606548448	Ga0065883_10274	pfam03752	ALF		2.6e-12
2606548448	Ga0065883_10274	pfam03752	ALF		5.8e-12
2606548448	Ga0065883_10274	pfam03752	ALF		1.4e-11
2606548448	Ga0065883_10274	Product_name		Short repeat-containing protein of unknown function
2606548448	Ga0065883_10274	DNA_length		753bp
2606548448	Ga0065883_10274	Protein_length		250aa
2606548449	Ga0065883_10275	Product_name		hypothetical protein
2606548449	Ga0065883_10275	DNA_length		276bp
2606548449	Ga0065883_10275	Protein_length		91aa
2606548450	Ga0065883_10276	pfam13468	Glyoxalase_3		2.8e-19
2606548450	Ga0065883_10276	Product_name		Glyoxalase-like domain-containing protein
2606548450	Ga0065883_10276	DNA_length		1023bp
2606548450	Ga0065883_10276	Protein_length		340aa
2606548451	Ga0065883_10277	Product_name		hypothetical protein
2606548451	Ga0065883_10277	DNA_length		438bp
2606548451	Ga0065883_10277	Protein_length		145aa
2606548452	Ga0065883_10278	COG2814	Predicted arabinose efflux permease, MFS family		3e-43
2606548452	Ga0065883_10278	pfam07690	MFS_1		1.1e-23
2606548452	Ga0065883_10278	pfam07690	MFS_1		4.9e-13
2606548452	Ga0065883_10278	Product_name		MFS transporter, DHA1 family, L-arabinose/isopropyl-beta-D-thiogalactopyranoside export protein
2606548452	Ga0065883_10278	DNA_length		1185bp
2606548452	Ga0065883_10278	Protein_length		394aa
2606548452	Ga0065883_10278	KO:K08159	MFS transporter, DHA1 family, L-arabinose/isopropyl-beta-D-thiogalactopyranoside export protein		0
2606548453	Ga0065883_10279	Product_name		hypothetical protein
2606548453	Ga0065883_10279	DNA_length		1065bp
2606548453	Ga0065883_10279	Protein_length		354aa
2606548454	Ga0065883_10280	Product_name		hypothetical protein
2606548454	Ga0065883_10280	DNA_length		549bp
2606548454	Ga0065883_10280	Protein_length		182aa
2606548455	Ga0065883_10281	Product_name		hypothetical protein
2606548455	Ga0065883_10281	DNA_length		795bp
2606548455	Ga0065883_10281	Protein_length		264aa
2606548456	Ga0065883_10282	pfam00583	Acetyltransf_1		2.1e-06
2606548456	Ga0065883_10282	Product_name		Acetyltransferase (GNAT) family protein
2606548456	Ga0065883_10282	DNA_length		618bp
2606548456	Ga0065883_10282	Protein_length		205aa
2606548457	Ga0065883_10283	pfam01833	TIG		4.6e-09
2606548457	Ga0065883_10283	pfam01833	TIG		1.2e-08
2606548457	Ga0065883_10283	pfam01833	TIG		3.2e-06
2606548457	Ga0065883_10283	pfam11999	DUF3494		7.2e-59
2606548457	Ga0065883_10283	Product_name		IPT/TIG domain-containing protein
2606548457	Ga0065883_10283	DNA_length		1317bp
2606548457	Ga0065883_10283	Protein_length		438aa
2606548458	Ga0065883_10284	pfam01833	TIG		3.7e-15
2606548458	Ga0065883_10284	pfam01833	TIG		3.5e-13
2606548458	Ga0065883_10284	pfam01833	TIG		2.6e-11
2606548458	Ga0065883_10284	Product_name		IPT/TIG domain-containing protein
2606548458	Ga0065883_10284	DNA_length		744bp
2606548458	Ga0065883_10284	Protein_length		247aa
2606548459	Ga0065883_10285	pfam01833	TIG		1.1e-11
2606548459	Ga0065883_10285	pfam01833	TIG		1.4e-09
2606548459	Ga0065883_10285	pfam01833	TIG		1.6e-08
2606548459	Ga0065883_10285	pfam01833	TIG		9e-08
2606548459	Ga0065883_10285	Product_name		IPT/TIG domain-containing protein
2606548459	Ga0065883_10285	DNA_length		1053bp
2606548459	Ga0065883_10285	Protein_length		350aa
2606548460	Ga0065883_10286	pfam16640	Big_3_5		9e-18
2606548460	Ga0065883_10286	Product_name		Ig-like domain (group 3)
2606548460	Ga0065883_10286	DNA_length		546bp
2606548460	Ga0065883_10286	Protein_length		181aa
2606548461	Ga0065883_10287	pfam00589	Phage_integrase		3.8e-05
2606548461	Ga0065883_10287	Product_name		Phage integrase family protein
2606548461	Ga0065883_10287	DNA_length		732bp
2606548461	Ga0065883_10287	Protein_length		243aa
2606548462	Ga0065883_10288	COG3236	Predicted NAD-dependent protein-ADP-ribosyltransferase YbiA, DUF1768 family		3e-41
2606548462	Ga0065883_10288	pfam08719	DUF1768		3.2e-37
2606548462	Ga0065883_10288	TIGR02464	conserved hypothetical protein, ribA/ribD-fused		1.4e-46
2606548462	Ga0065883_10288	Product_name		hypothetical protein
2606548462	Ga0065883_10288	DNA_length		513bp
2606548462	Ga0065883_10288	Protein_length		170aa
2606548462	Ga0065883_10288	KO:K09935	uncharacterized protein		2.7e-89
2606548463	Ga0065883_10289	Product_name		hypothetical protein
2606548463	Ga0065883_10289	DNA_length		420bp
2606548463	Ga0065883_10289	Protein_length		139aa
2606548464	Ga0065883_10290	COG1280	Threonine/homoserine/homoserine lactone efflux protein		5e-27
2606548464	Ga0065883_10290	pfam01810	LysE		1.6e-27
2606548464	Ga0065883_10290	Product_name		Threonine/homoserine/homoserine lactone efflux protein
2606548464	Ga0065883_10290	DNA_length		642bp
2606548464	Ga0065883_10290	Protein_length		213aa
2606548465	Ga0065883_10291	pfam00440	TetR_N		3.2e-05
2606548465	Ga0065883_10291	pfam13305	WHG		4.9e-07
2606548465	Ga0065883_10291	Product_name		transcriptional regulator, TetR family
2606548465	Ga0065883_10291	ITERM:02313		transcriptional regulator, TetR family
2606548465	Ga0065883_10291	DNA_length		573bp
2606548465	Ga0065883_10291	Protein_length		190aa
2606548466	Ga0065883_10292	pfam14606	Lipase_GDSL_3		2.8e-12
2606548466	Ga0065883_10292	Product_name		GDSL-like Lipase/Acylhydrolase family protein
2606548466	Ga0065883_10292	DNA_length		1221bp
2606548466	Ga0065883_10292	Protein_length		406aa
2606548467	Ga0065883_10293	pfam00296	Bac_luciferase		9.7e-51
2606548467	Ga0065883_10293	TIGR03619	probable F420-dependent oxidoreductase, Rv2161c family		8e-71
2606548467	Ga0065883_10293	Product_name		probable F420-dependent oxidoreductase, Rv2161c family
2606548467	Ga0065883_10293	DNA_length		945bp
2606548467	Ga0065883_10293	Protein_length		314aa
2606548468	Ga0065883_10294	COG1028	NAD(P)-dependent dehydrogenase, short-chain alcohol dehydrogenase family		3e-41
2606548468	Ga0065883_10294	pfam13561	adh_short_C2		5.2e-66
2606548468	Ga0065883_10294	EC:1.1.1.53	3-alpha(or 20-beta)-hydroxysteroid dehydrogenase.
2606548468	Ga0065883_10294	Product_name		3alpha(or 20beta)-hydroxysteroid dehydrogenase
2606548468	Ga0065883_10294	DNA_length		786bp
2606548468	Ga0065883_10294	Protein_length		261aa
2606548468	Ga0065883_10294	KO:K00038	3alpha(or 20beta)-hydroxysteroid dehydrogenase [EC:1.1.1.53]		0
2606548469	Ga0065883_10295	COG2141	Flavin-dependent oxidoreductase, luciferase family (includes alkanesulfonate monooxygenase SsuD and methylene tetrahydromethanopterin reductase)		2e-34
2606548469	Ga0065883_10295	pfam00296	Bac_luciferase		7.7e-43
2606548469	Ga0065883_10295	Product_name		Flavin-dependent oxidoreductase, luciferase family (includes alkanesulfonate monooxygenase SsuD and methylene tetrahydromethanopterin reductase)
2606548469	Ga0065883_10295	DNA_length		1125bp
2606548469	Ga0065883_10295	Protein_length		374aa
2606548470	Ga0065883_10296	COG3653	N-acyl-D-aspartate/D-glutamate deacylase		4e-70
2606548470	Ga0065883_10296	pfam07969	Amidohydro_3		4.2e-69
2606548470	Ga0065883_10296	Product_name		N-acyl-D-aspartate/D-glutamate deacylase
2606548470	Ga0065883_10296	DNA_length		1740bp
2606548470	Ga0065883_10296	Protein_length		579aa
2606548471	Ga0065883_10297	COG1012	Acyl-CoA reductase or other NAD-dependent aldehyde dehydrogenase		7e-124
2606548471	Ga0065883_10297	pfam00171	Aldedh		0
2606548471	Ga0065883_10297	Product_name		Acyl-CoA reductase
2606548471	Ga0065883_10297	DNA_length		1527bp
2606548471	Ga0065883_10297	Protein_length		508aa
2606548472	Ga0065883_10298	COG0531	Amino acid transporter		3e-20
2606548472	Ga0065883_10298	pfam13520	AA_permease_2		1.3e-27
2606548472	Ga0065883_10298	Product_name		amino acid/polyamine/organocation transporter, APC superfamily
2606548472	Ga0065883_10298	ITERM:06801		amino acid/polyamine/organocation transporter, APC superfamily (TC 2.A.3)
2606548472	Ga0065883_10298	DNA_length		1566bp
2606548472	Ga0065883_10298	Protein_length		521aa
2606548473	Ga0065883_10299	pfam04954	SIP		3e-09
2606548473	Ga0065883_10299	Product_name		Siderophore-interacting protein
2606548473	Ga0065883_10299	DNA_length		171bp
2606548473	Ga0065883_10299	Protein_length		56aa
2606548474	Ga0065883_102100	Product_name		hypothetical protein
2606548474	Ga0065883_102100	DNA_length		1593bp
2606548474	Ga0065883_102100	Protein_length		530aa
2606548474	Ga0065883_102100	KO:K07053	uncharacterized protein		0
2606548475	Ga0065883_102101	pfam00296	Bac_luciferase		3.1e-48
2606548475	Ga0065883_102101	TIGR03619	probable F420-dependent oxidoreductase, Rv2161c family		2.4e-75
2606548475	Ga0065883_102101	Product_name		probable F420-dependent oxidoreductase, Rv2161c family
2606548475	Ga0065883_102101	DNA_length		846bp
2606548475	Ga0065883_102101	Protein_length		281aa
2606548476	Ga0065883_102102	pfam01839	FG-GAP		4.6e-10
2606548476	Ga0065883_102102	Product_name		FG-GAP repeat-containing protein
2606548476	Ga0065883_102102	DNA_length		1587bp
2606548476	Ga0065883_102102	Protein_length		528aa
2606548477	Ga0065883_102103	pfam13385	Laminin_G_3		5.1e-23
2606548477	Ga0065883_102103	pfam13385	Laminin_G_3		2.3e-16
2606548477	Ga0065883_102103	Product_name		Concanavalin A-like lectin/glucanases superfamily protein
2606548477	Ga0065883_102103	DNA_length		3585bp
2606548477	Ga0065883_102103	Protein_length		1194aa
[truncated: 43,521 more rows]
